# Supplementary material for: Analysis of Potential Hub Genes for Neuropathic Pain Based on Differential Expression in Rat Models
Source: Hindawi journal article supplement (doi:10.1155/2022/6571987), 2022-03-03
Supplement: f1 [file 6571987.f1.zip]

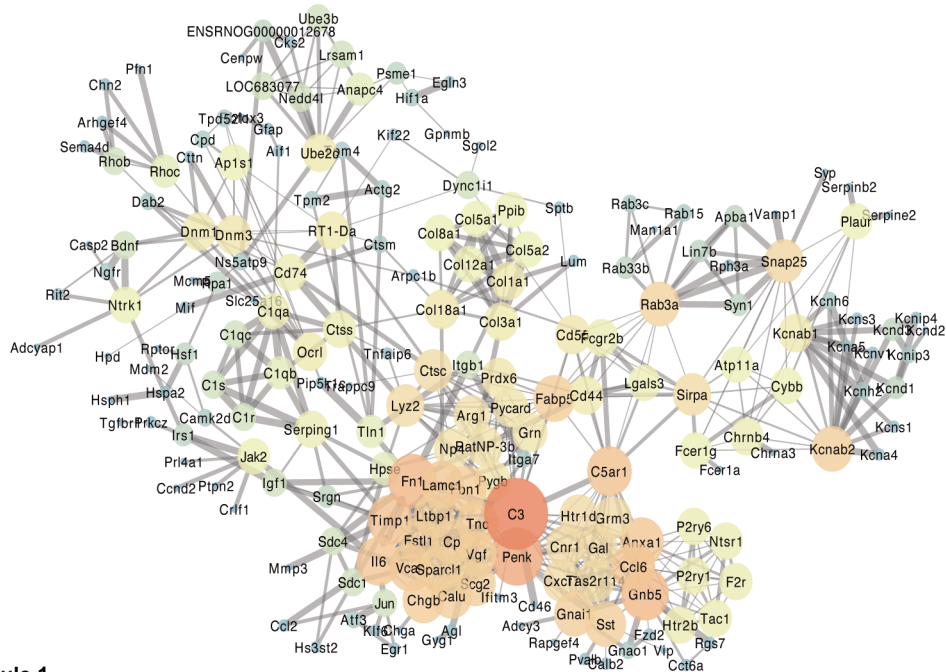

**Module 1**

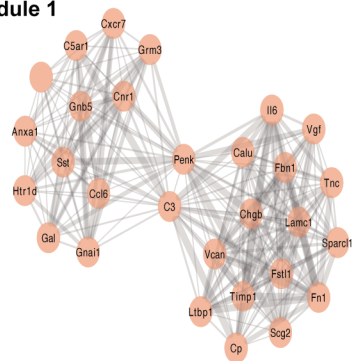

**Module 2**

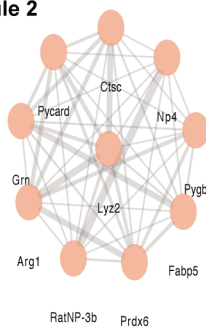

**Module 3**

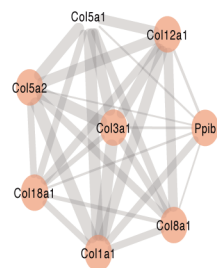

**PPI network of DEGs obtained from RRA analysis. DEGs, differentially expressed genes; PPI, protein-protein interaction; RRA, robust rank aggregation**
