# Supplementary material for: Analysis of Potential Hub Genes for Neuropathic Pain Based on Differential Expression in Rat Models
Source: Pain Res Manag. 2022 Mar 3;2022:6571987. doi: 10.1155/2022/6571987 (PMC8913144; doi:10.1155/2022/6571987)
Supplement: Supplementary Materials — Supplementary Figure 1. PPI network of DEGs from RRA analysis. DEGs, differentially expressed genes; PPI, protein-protein interaction; RRA, robust rank aggregation. Supplementary Figure 2. GSEA of candidate hub genes in the GEO dataset. (A) C, (E) and (G) GSEA of the single candidate hub genes in GO terms. (A) VOM2R75, (C) TJP, (E) FOXP1, (G) EXT1, and(B, (D) F, and (H) GSEA of the single candidate hub genes in KEGG pathways. (B) VOM2R75, (D) TJP, (F) FOXP1, and (H) EXT1. GEO, Gene Expression Omnibus; GO, Gene Ontology; GSEA, gene set enrichment analysis. Supplementary 1. Upregulated and downregulated genes obtained by RRA analysis. Supplementary 2. Top 50 genes with the highest connectivity. Supplementary 3. Enrichment of DEGs in the turquoise module in GO and KEGG pathways. Supplementary 4.Heatmap of the top 20 upregulated and downregulated genes identified by RRA analysis. Supplementary 5. Repeated measure ANOVA followed by Tukey's multiple comparison test was used to evaluate the paw withdrawal threshold (PWT) between the Sham and SNI groups in Figure 8(a) and Table 2. Supplementary 6.Expression of the five hub genes in the Sham and SNI groups measured using RT-qPCR in Figure 8(b) and Table 3. [file 6571987.f1.zip › 6571987.f1/Supplementary 1.txt]

ENTREZID	SYMBOL	Pvalue	adjPvalue	logFC
24618	Reg3b	3.85E-07	0.00296031	1.792755222
25389	Atf3	4.33E-07	0.00296031	1.712055617
29141	Gal	7.69E-07	0.003402852	1.420233299
24795	Serpina3n	1.20E-06	0.003402852	1.28583277
117505	Csrp3	1.24E-06	0.003402852	1.219810335
294269	RT1-Da	1.93E-06	0.004390433	0.975986998
24232	C3	2.58E-06	0.005032046	0.99547911
25112	Gadd45a	3.08E-06	0.00526149	1.345433794
499660	Sprr1a	6.50E-06	0.009878474	1.019776127
117064	Vip	8.12E-06	0.011112189	1.36527355
29221	Arg1	1.08E-05	0.013448083	0.964142533
29687	C1qb	2.12E-05	0.024154652	0.817895045
24516	Jun	3.25E-05	0.034169674	0.889728241
29461	Vgf	3.50E-05	0.034214941	0.693706725
27064	Ankrd1	3.77E-05	0.034341551	0.949991375
309122	H19	4.17E-05	0.035684553	0.825908583
60335	Tgm1	4.62E-05	0.037136929	0.974282895
25399	Cacna2d1	4.92E-05	0.037371263	0.987548683
54227	Arpc1b	5.94E-05	0.042742914	0.802370332
79423	Stmn4	6.93E-05	0.047415497	0.879290288
24166	Adcyap1	7.30E-05	0.047563283	0.874899339
29427	Aif1	7.68E-05	0.047757105	0.640111175
361945	Postn	8.50E-05	0.050546709	0.589328941
289211	Fcgr2b	9.29E-05	0.050928931	0.786466017
25454	Gfra1	9.72E-05	0.050928931	0.652320902
79426	Zfp36	0.000100525	0.050928931	0.526899998
688459	LOC688459	0.000100525	0.050928931	0.793388606
25383	Apobec1	0.000115209	0.054694962	0.703089468
360626	Krt19	0.000119374	0.054694962	0.579208049
113976	Acsl4	0.000119954	0.054694962	0.730532698
54133	Pdlim1	0.000124794	0.055066314	0.542265058
84046	Sox11	0.000153656	0.065683111	0.761694992
114856	Dusp1	0.000159165	0.065976302	0.477944336
29244	Gch1	0.000178443	0.071791969	0.721346161
497811	Xdh	0.000190318	0.074381632	0.362661319
25661	Fn1	0.000200372	0.076135816	0.812480515
60417	Ecel1	0.000208844	0.076200198	0.597688822
25211	Lyz2	0.00021521	0.076200198	0.692630471
116510	Timp1	0.000221672	0.076200198	0.774877293
292994	Tjp1	0.000222824	0.076200198	0.469408982
24653	Pla2g4a	0.000239499	0.079905115	0.412591718
64195	Clec10a	0.000276646	0.088862631	0.649381179
60325	Serpinb2	0.00027934	0.088862631	0.636147626
50654	Ctss	0.000306632	0.095327646	0.707398613
25426	Cyp1b1	0.00031433	0.095549374	0.594179921
64440	Syt4	0.000327862	0.097496263	0.682516661
192262	C1s	0.000337995	0.098371044	0.56941198
361749	Il33	0.000370879	0.105692861	0.519111234
65161	Litaf	0.000414121	0.106127934	0.551104228
25056	Rbp1	0.000423056	0.106127934	0.722349886
314856	Mdm2	0.000426631	0.106127934	0.384631171
29186	Cd63	0.000432081	0.106127934	0.528780264
25406	Cd44	0.000441204	0.106127934	0.567335763
295703	Serping1	0.000441204	0.106127934	0.638435818
64200	Hnrnpf	0.000457836	0.106127934	0.390645259
24230	Tspo	0.000459734	0.106127934	0.583006073
25236	Gpc3	0.000465393	0.106127934	0.480343312
266803	Sostdc1	0.000467296	0.106127934	0.426075195
25066	Pvr	0.000469141	0.106127934	0.605390632
25671	Smad1	0.000497932	0.106127934	0.610772047
306748	Cxcl14	0.000497932	0.106127934	1.658273906
25683	Col12a1	0.000502426	0.106127934	0.402354515
65205	Mmp16	0.000507718	0.106127934	0.55962582
59107	Ltbp1	0.000510465	0.106127934	0.556207521
113984	Nr2f2	0.000514516	0.106127934	0.386740254
291885	Mcm5	0.000520633	0.106127934	0.373503106
25668	Cd38	0.000522683	0.106127934	0.362715533
25380	Anxa1	0.000527575	0.106127934	0.58249966
24770	Ccl2	0.000558071	0.110635529	0.5973323
295342	Rhoc	0.000610791	0.119357205	0.577097846
25599	Cd74	0.000620589	0.119563817	0.614240225
79128	Dab2	0.000654669	0.123278659	0.418688487
29253	Maoa	0.000688571	0.127283338	0.443646472
315265	Twf1	0.000735097	0.134071887	0.445323218
60460	Hspa2	0.000758927	0.134822814	0.518128856
361673	Ifitm3	0.000758927	0.134822814	0.323913336
113959	C5ar1	0.000785204	0.136109737	0.395937915
85246	Gas7	0.000795379	0.136109737	0.475384512
50692	Plaur	0.000796022	0.136109737	0.358998962
81008	Itga7	0.000820153	0.138504568	0.416497935
100912108	Nupr1	0.000834666	0.139236494	0.492420022
24852	Tpm4	0.000854448	0.139570349	0.549453388
29423	Gap43	0.000870832	0.139570349	0.536789836
114505	Klf4	0.000871651	0.139570349	0.365233813
170907	Serinc5	0.000892012	0.139570349	0.39515223
64467	Entpd2	0.000896738	0.139570349	0.451652557
362332	Flnc	0.000897887	0.139570349	0.472495943
24312	Dhfr	0.000992274	0.15250917	0.582563843
24330	Egr1	0.001024075	0.155648064	0.465077047
24246	Camk2d	0.001045956	0.157226693	0.457832009
293725	Eef1g	0.001069728	0.159052292	0.338873591
29220	Thbs4	0.001088629	0.16012208	0.61100976
171164	Gbp2	0.001132148	0.163017466	0.900526667
299156	Rab15	0.001132148	0.163017466	0.366266377
29308	Arl4a	0.001146843	0.163413202	0.449694881
102549726	LOC102549726	0.001191491	0.165866606	0.46088554
24437	H1f0	0.001193307	0.165866606	0.327345603
54278	Nr4a2	0.001200438	0.165866606	0.334136462
360757	Medag	0.001298958	0.177684499	0.432140493
25276	Sycp1	0.001315693	0.177896306	0.812785963
312705	C1r	0.001330508	0.177896306	0.449450717
257646	Frmd6	0.001345235	0.177896306	0.349921335
50677	Ptpro	0.001356832	0.177896306	0.63405138
29279	Meox2	0.001372398	0.177896306	0.421303973
394266	Gjb2	0.001435852	0.183560872	0.345761292
64314	Casp2	0.001468299	0.184264783	0.412680185
25267	Pdgfra	0.001509541	0.186174931	0.440597167
84604	Hamp	0.00151074	0.186174931	0.789024352
94167	Prdx6	0.001561863	0.189889847	0.33706892
58954	Klf6	0.001579091	0.189889847	0.517330771
171045	Mmp3	0.001594327	0.189889847	0.403549612
29143	Grn	0.001596413	0.189889847	0.312301966
83807	Ybx3	0.001629111	0.192108752	0.5228539
499322	Fam111a	0.00164894	0.192785053	0.444108242
116598	Pdia4	0.001664398	0.192943202	0.322884611
24514	Jak2	0.001738357	0.199823377	0.412843324
116685	Lmnb1	0.001924202	0.216869766	0.646148808
287437	Tnfsf13	0.001925769	0.216869766	0.302967542
117543	Decr1	0.00194542	0.216869766	0.306684446
500037	Foxp2	0.001973396	0.216869766	0.752696338
170751	Xpnpep1	0.001975145	0.216869766	0.31186526
498709	Cks2	0.001981776	0.216869766	0.584758089
58934	Pdcd2	0.002020626	0.219241234	0.363335677
24915	Pdlim4	0.002079601	0.222241104	0.347526248
89828	Chl1	0.002119384	0.223008066	0.418642715
64366	Calu	0.002138808	0.223334017	0.367028703
313494	Tln1	0.002179757	0.225420308	0.313287448
116670	Ppp1r12a	0.002191747	0.225420308	0.416497759
303794	Dgcr6	0.002282242	0.232976075	0.35898146
25216	Sdc1	0.002387056	0.240092191	0.491493009
25603	Marcks	0.002486953	0.248203269	0.417594629
362634	C1qc	0.002569128	0.248203269	0.676665609
24511	Itgb1	0.002581581	0.248203269	0.39922662
81771	Rps6ka1	0.002592934	0.248203269	0.353673295
25291	Anxa3	0.002598908	0.248203269	0.419817157
116663	Dusp6	0.002622898	0.248203269	0.423979263
24656	Prl4a1	0.002631002	0.248203269	0.648617618
25528	Sirpa	0.002695752	0.252569843	0.339351424
24268	Cp	0.002720334	0.253139068	0.559228079
362325	Mdfic	0.002829554	0.258420227	0.434347277
294410	Man1a1	0.002852654	0.258420227	0.330548337
363004	Prr13	0.002875847	0.258807279	0.372348556
29618	Btg1	0.003040791	0.268354708	0.425465441
24648	Serpina1	0.003112871	0.271895859	0.333711277
29366	Serpine2	0.00312067	0.271895859	0.333560686
24225	Bdnf	0.003168192	0.27256418	0.342741974
84032	Col3a1	0.003195563	0.27320069	0.387857545
25705	Zeb1	0.003216195	0.273256679	0.339862113
289089	Ivns1abp	0.003257723	0.27428996	0.330835019
291234	Mki67	0.003288512	0.27428996	0.766100483
140868	Fabp5	0.003309159	0.274339276	0.353948327
298024	Akap2	0.003334111	0.274742784	0.326372086
64367	Ppib	0.003398731	0.27839066	0.308813963
79558	Acvr1	0.003434607	0.278583189	0.321084528
117036	Lamc1	0.003441813	0.278583189	0.318213005
25247	Nsg1	0.003511365	0.279498763	0.530354317
114122	Vcan	0.003514423	0.279498763	0.397773514
29630	Psme1	0.003617781	0.286055681	0.370697231
288620	Cct6a	0.003692837	0.288677336	0.319976617
56759	Rnase4	0.003693145	0.288677336	0.339927613
29560	Hif1a	0.003719483	0.289084141	0.368993383
29707	Gabra5	0.003772435	0.291405051	0.351182784
24787	Sod2	0.003825757	0.291576675	0.3248564
29531	Hpd	0.003877189	0.291576675	0.393195978
501203	Myl12a	0.003879447	0.291576675	0.458281961
83781	Lgals3	0.003879447	0.291576675	0.357898501
24498	Il6	0.003933506	0.291763878	0.418009704
24687	Prp15	0.003945926	0.291763878	0.620016273
84397	Tnfaip6	0.003945926	0.291763878	0.76444453
64033	Ccnd2	0.004099902	0.297907468	0.37821939
64373	Rhob	0.004173259	0.297907468	0.358284122
117063	Ptpn2	0.004237415	0.300329526	0.350998386
25314	Emp1	0.004265595	0.30076844	0.51835987
303380	Slfn2	0.004322232	0.301312584	0.401462248
29393	Col1a1	0.004322586	0.301312584	0.344130514
85490	Col5a1	0.004339395	0.301312584	0.311071496
313089	Slc7a13	0.004603243	0.313272469	0.626119975
299153	Ppp1r36	0.004640304	0.313893303	0.341796598
192110	Pou3f1	0.004720291	0.316514002	0.314377901
497770	Scn3a	0.004818481	0.317783203	0.531157265
100360501	Rnh1	0.004818481	0.317783203	0.324239226
25239	Apod	0.004848499	0.317783203	0.348934294
291081	Tubb2b	0.004864137	0.317783203	0.356207085
81682	Lum	0.004927978	0.319477805	0.449343696
500450	Tpm2	0.004983142	0.321530176	0.369242183
298199	Plin2	0.005030527	0.323063757	0.357481824
314711	Spic	0.005260465	0.332501831	0.619026194
500183	Igkc	0.00527472	0.332501831	0.484448062
365793	Rab33b	0.005436232	0.337569908	0.396109724
117264	P2ry6	0.005488403	0.337569908	0.37931844
81768	Rpl22	0.005517982	0.337569908	0.370062356
683626	Lbh	0.005527865	0.337569908	0.327199411
301476	Ikzf2	0.00591759	0.350418694	0.607080488
113955	Gpnmb	0.00591759	0.350418694	0.702420796
60465	Cttn	0.005990079	0.350471357	0.350341105
29227	Nfib	0.005995343	0.350471357	0.319948567
84577	Hdac2	0.006037195	0.351416142	0.34366245
24577	Myc	0.006328187	0.363711217	0.369940011
302396	Nexmif	0.00657462	0.372186942	0.606833008
361324	Sema6a	0.00657462	0.372186942	0.736506723
85250	Col5a2	0.006605229	0.372186942	0.363996011
25695	Cebpd	0.006640269	0.372186942	0.425308521
58819	Txnrd1	0.006888092	0.379928246	0.320099674
25423	Ctsc	0.006959716	0.380026091	0.314389205
364396	Arl11	0.006959716	0.380026091	0.36129442
305604	Efemp1	0.006973211	0.380026091	0.324091774
56782	Srgn	0.007218477	0.382898071	0.331953888
316425	Sgo2	0.007231553	0.382898071	0.600043722
29566	Ggt5	0.007323282	0.384524321	0.388009215
25306	Cpd	0.007421187	0.384524321	0.312523547
360785	Ap1s1	0.007583173	0.388502703	0.349349359
102548785	LOC102548785	0.00788839	0.393814905	0.587245849
64512	Fzd2	0.008039021	0.395560336	0.384019077
171577	Epcam	0.008115717	0.396929616	0.310454185
29151	Ucn	0.008193865	0.396929616	0.364302916
291005	Gadd45g	0.008310945	0.397501476	0.569033936
24615	S100a4	0.008386936	0.399738338	0.466539559
689399	Cenpw	0.008518185	0.401679872	0.379760151
293989	Cyp2c6v1	0.008545131	0.401679872	0.584250376
64550	Top1	0.008865824	0.41110375	0.316965617
24695	Pthlh	0.008989742	0.414042694	0.413954457
300795	Pclaf	0.009153243	0.415190397	0.420967191
29596	Ifrd1	0.009181126	0.415190397	0.348654605
24867	Smr3b	0.009201776	0.415190397	0.577430431
290655	Crlf1	0.009201776	0.415190397	0.570884157
361448	Ginm1	0.00927855	0.415190397	0.302904809
362251	Rbm39	0.009306511	0.415190397	0.424747296
29581	Htr2b	0.009858324	0.425436171	0.579354956
287910	Ccl6	0.010381636	0.436955078	0.715829965
291541	Cidea	0.010381636	0.436955078	0.336253531
315496	Dpy19l1	0.010501896	0.438511074	0.307362687
24416	Grm3	0.010514777	0.438511074	0.573714186
117041	Nln	0.010684975	0.440424478	0.301334319
25123	Tagln	0.010689446	0.440424478	0.449051003
363088	Ccnb2	0.010911995	0.448243763	0.442076075
309600	RT1-CE12	0.011136779	0.450577787	0.332454858
680478	Lrrc19	0.011171133	0.450577787	0.557058033
171162	Reg3a	0.011171133	0.450577787	0.43334799
24387	Gfap	0.011171133	0.450577787	0.538196277
102556515	LOC102556515	0.011827394	0.463572837	0.554870716
300236	Smagp	0.011827394	0.463572837	0.67579975
114090	Egr2	0.011917743	0.465779451	0.326113516
369016	Myadm	0.011964485	0.46627404	0.347109748
297339	Capg	0.012126344	0.467228746	0.440389125
24771	Sdc4	0.012159766	0.467228746	0.369969444
307429	Dmxl1	0.012483558	0.473026572	0.553830931
81717	Ctbp2	0.01272446	0.480613314	0.536737246
140668	Abcc3	0.012772714	0.480613314	0.308581567
498659	RatNP-3b	0.013139627	0.489746461	0.525704178
29469	Lbp	0.013139627	0.489746461	0.452612229
63839	Fhl2	0.013756444	0.507208607	0.307032166
286958	Np4	0.013795599	0.507284935	0.542556819
685277	Ildr2	0.014261602	0.518841617	0.419144208
24482	Igf1	0.014447548	0.521587669	0.417080374
102555617	LOC102555617	0.014451475	0.521587669	0.532716328
498038	Vgll3	0.015107255	0.528452704	0.504309732
298566	C1qa	0.015107255	0.528452704	0.600163791
502902	Clec7a	0.015762939	0.538172056	0.534808742
85251	Col18a1	0.015762939	0.538172056	0.551522165
304021	Col8a1	0.016153292	0.540246659	0.552786449
64303	Pfn1	0.017131477	0.552745905	0.33510444
50621	Slc23a1	0.017729416	0.565316259	0.514390367
246334	Tp63	0.018384716	0.572857687	0.521779442
116640	Tnc	0.018384716	0.572857687	0.613621932
305420	Anapc4	0.018801541	0.583188851	0.320401321
63866	Asic5	0.01903992	0.585274295	0.520388835
303439	Mmd	0.01903992	0.585274295	0.521943829
282817	Pycard	0.019618443	0.589803692	0.436187441
366403	Fam29a	0.019695028	0.589992402	0.519255783
361735	Ms4a6a	0.01997683	0.592761517	0.369327729
296368	Ube2c	0.020217495	0.594045471	0.379171445
171406	Prl8a9	0.02035004	0.594045471	0.517825666
309499	Myof	0.020398906	0.594045471	0.510314145
308906	Trim5	0.02045955	0.594195733	0.362144771
29692	Pla2g2a	0.020983186	0.603627714	0.313208042
54289	Rgs1	0.021004956	0.603627714	0.545688967
691979	Esco2	0.021659776	0.614697254	0.510833759
307035	Mpp7	0.0223145	0.621933476	0.509340556
25047	Fcer1a	0.022410029	0.621933476	0.446930669
83472	Ugdh	0.022662392	0.626048415	0.344565582
361746	Rfx3	0.022969128	0.629648712	0.508185584
306117	Tbc1d4	0.023623661	0.638632518	0.508176032
24777	Slc10a1	0.024278097	0.646109121	0.507282771
294917	Tnik	0.024278097	0.646109121	0.607303965
301164	Kat2b	0.024786425	0.656263937	0.395889955
501576	RGD1564534	0.024932437	0.657130656	0.500781912
24718	Reln	0.025523807	0.663016093	0.357362017
313152	Ifnk	0.025586682	0.663016093	0.491574849
302192	LOC302192	0.02624083	0.670803146	0.490592379
94195	S100a9	0.026821898	0.675999901	0.445535255
100912517	LOC100912517	0.026894883	0.675999901	0.487269765
64552	Mpeg1	0.026894883	0.675999901	0.582832022
246297	Myocd	0.02754884	0.680773515	0.486423275
498690	Ctla2a	0.029438244	0.700323035	0.377330577
102549278	LOC102549278	0.029510134	0.700814456	0.481266012
499663	Lce1f	0.030163707	0.705715634	0.480760157
680404	C1ql3	0.030817185	0.707521591	0.479994766
300228	Lima1	0.030974992	0.709064062	0.352945594
64455	Rasd1	0.031470566	0.711023727	0.586590145
353252	Rdh10	0.03171991	0.713645811	0.330459525
29591	Tgfbr1	0.032020245	0.716838769	0.336495546
292625	Crxos1	0.032123852	0.716838769	0.479375738
84348	Ackr3	0.032123852	0.716838769	0.45193109
291091	Serpinb1a	0.032246384	0.717232979	0.352045305
286989	Ugt2b7	0.032443996	0.720456859	0.351484375
66021	Cybb	0.03262497	0.72330139	0.343748421
29333	Cd46	0.032777041	0.724324955	0.478914587
291463	Ppic	0.033082057	0.728710872	0.361202213
291813	Cmtm3	0.033235093	0.729731688	0.483758235
25013	Semg1	0.033430135	0.732837849	0.475160275
290644	Ifi30	0.03385061	0.737034607	0.53363393
170573	Slc38a4	0.034083133	0.737034607	0.475017573
306071	Lcp1	0.034083133	0.737034607	0.405805094
406864	Clic1	0.034160388	0.737034607	0.55334929
117515	Septin2	0.034315781	0.738059072	0.355214092
102556209	LOC102556209	0.034736035	0.741137145	0.473347458
286986	Vom2r75	0.035388842	0.748707371	0.491527987
29579	Esyt1	0.035650191	0.751400556	0.317089241
25714	Myf6	0.036041552	0.754996004	0.469236312
83727	Fbn1	0.036041552	0.754996004	0.430791826
25441	Fcer1g	0.036694167	0.758216778	0.466171765
310810	Frrs1	0.037346686	0.769375471	0.460025802
306424	Mfap3l	0.037999109	0.772347412	0.457564476
296156	Cpxm1	0.038064082	0.772520142	0.306061139
312912	Prex2	0.038651436	0.77767927	0.456669701
367313	Col6a3	0.038651436	0.77767927	0.357875825
300811	Bnip2	0.038885411	0.77874683	0.347838277
499990	Tmem243	0.039303668	0.77882845	0.454533528
60374	Lmna	0.039631725	0.778911455	0.33627699
100360205	LOC100360205	0.039881994	0.780155535	0.34364737
83820	Sycp2	0.039955803	0.780155535	0.452624119
54279	Cntn3	0.040346921	0.780155535	0.302592339
498982	RGD1560020_predicted	0.040607843	0.780155535	0.451601731
83718	Clic4	0.040637285	0.780155535	0.434343299
294009	Cuedc2	0.040721621	0.780155535	0.432254759
25694	Has2	0.041259788	0.783256736	0.48076841
102555465	LOC102555465	0.041911636	0.786408902	0.44930586
497039	Amy2a3	0.042563389	0.791708888	0.447375523
24891	Abcb4	0.042597978	0.791708888	0.374242693
305066	Prox1	0.043866607	0.806543854	0.470401602
691644	Myh2	0.044518072	0.810869126	0.37468144
83580	Thbd	0.045169442	0.81822632	0.396957637
25526	Ptgds	0.045221076	0.81822632	0.308731607
306720	Ctsm	0.045820716	0.823689278	0.436968337
307351	Tubb6	0.045820716	0.823689278	0.488110255
65180	Kcnd2	0.046471895	0.828799281	0.436537278
84583	Rgs2	0.046650341	0.830409453	0.400078646
293294	Trim6	0.047122977	0.832325801	0.436323431
78982	Tas2r114	0.048424856	0.834977767	0.435612916
192209	Spdya	0.049075651	0.835538388	0.416376074
293502	Kif22	0.049075651	0.835538388	0.444736908
306182	Ipo5	0.049109793	0.835538388	0.472832921
25467	Irs1	0.049726351	0.839761432	0.381658361
25417	Dpysl4	5.94E-08	0.000812115	-0.910936154
83588	Kcns3	1.92E-07	0.001315757	-1.22791912
24797	Sst	3.85E-07	0.001754172	-0.938050584
117023	Kcns1	6.70E-07	0.001754172	-0.914401672
29701	Scn11a	7.20E-07	0.001754172	-1.267766901
25269	Pvalb	7.69E-07	0.001754172	-0.881830627
140581	Patj	1.36E-06	0.002631002	-0.772983034
293632	Ifitm10	1.69E-06	0.002631002	-0.751356792
83834	Nrn1	1.73E-06	0.002631002	-0.831871907
81574	Scn1a	2.36E-06	0.00322282	-0.9211477
293451	Hs3st2	3.89E-06	0.004842727	-1.126937951
24765	Scg2	5.82E-06	0.0066307	-1.092712516
246274	Faim2	6.72E-06	0.007073401	-0.638063779
24877	Vsnl1	1.04E-05	0.010157704	-0.737759136
79246	Htr3a	1.23E-05	0.010669907	-0.869702146
54231	Car2	1.25E-05	0.010669907	-0.640185536
65195	Kcnd3	1.39E-05	0.011175761	-0.796494957
24417	Grm4	1.60E-05	0.012160005	-0.567617608
29571	Scn10a	1.92E-05	0.013837927	-0.866388205
266600	Csdc2	2.08E-05	0.014252928	-0.621391037
295365	Amigo1	2.33E-05	0.015147757	-0.734069672
29480	Rgs4	2.66E-05	0.016517685	-0.893459398
691455	Calml4	3.07E-05	0.017154067	-0.636536976
252857	Rapgef4	3.25E-05	0.017154067	-0.76559796
79131	Fabp3	3.25E-05	0.017154067	-0.756347954
25041	P2rx6	3.26E-05	0.017154067	-0.510453419
29510	Pctp	3.39E-05	0.017181612	-0.623853161
29559	Grik1	3.77E-05	0.017762871	-0.789512826
29272	Dpp6	3.77E-05	0.017762871	-0.729551619
25731	Syt3	3.99E-05	0.018177173	-0.51023374
60326	Kcnv1	4.29E-05	0.018926274	-0.572579243
25101	Chrna3	5.23E-05	0.022354606	-0.656629254
266777	Nptx1	7.30E-05	0.030267543	-0.979591861
57233	Isl2	7.68E-05	0.030901656	-0.60884663
117059	Calb2	7.96E-05	0.03111179	-0.666664751
117026	Apbb3	9.00E-05	0.034188248	-0.436980744
25531	Rab3a	9.29E-05	0.03435259	-0.56856004
58977	Ppp1r1a	9.72E-05	0.034984533	-0.701437698
171051	Cabp1	0.000114831	0.03906783	-0.504806257
65096	Adgrl1	0.000119374	0.03906783	-0.545810477
24949	Syn1	0.000119374	0.03906783	-0.48709325
81821	Dgkz	0.000119954	0.03906783	-0.638623915
25736	Kcnb1	0.000127208	0.040466835	-0.652657011
171058	Rab3c	0.000133716	0.041570485	-0.481470177
81675	Gyg1	0.000150426	0.045692599	-0.631458036
24804	Syp	0.000153656	0.045692599	-0.409049493
361076	Dgkh	0.000172649	0.047973714	-0.698187721
362837	Ndufs7	0.000177476	0.047973714	-0.413158194
117038	Mt3	0.000178477	0.047973714	-0.619040034
313771	Cptp	0.00018049	0.047973714	-0.473037044
171519	Calcb	0.000184333	0.047973714	-0.576550612
50594	Nbl1	0.000188693	0.047973714	-0.410558563
26760	Akr7a3	0.000189735	0.047973714	-0.431985067
688272	Rnf157	0.000190318	0.047973714	-0.546799147
102552880	LOC102552880	0.000195005	0.047973714	-0.586096633
171048	Tspan8	0.000196398	0.047973714	-0.400575858
25698	Ass1	0.000205836	0.049397137	-0.632024109
288689	Tesc	0.00021521	0.050756227	-0.58660538
316406	RGD1306941	0.000231061	0.053570968	-0.61278122
25659	Khk	0.000237068	0.0540475	-0.422746421
29709	Gabrg2	0.000255406	0.056729241	-0.461301878
24183	Ak1	0.000259552	0.056729241	-0.443953801
100911038	LOC100911038	0.000264734	0.056729241	-0.580612291
83810	Trpv1	0.000269567	0.056729241	-0.683802207
252880	Drgx	0.000269567	0.056729241	-0.577515609
25274	Tst	0.000275305	0.057058994	-0.422869779
291129	Nrsn1	0.00031433	0.062947536	-0.868669158
59109	Ntrk1	0.00031433	0.062947536	-0.60481999
113907	Sbk1	0.000318921	0.062947536	-0.419622769
24211	Atp1a1	0.000322124	0.062947536	-0.505668117
362737	Heatr5a	0.00037673	0.072581497	-0.560720758
24916	Rnf112	0.000387891	0.072779318	-0.651413712
24241	Calca	0.000388398	0.072779318	-0.515094101
58963	Htr3b	0.000396539	0.07330082	-0.728948576
287847	Rbfox3	0.000405282	0.073918118	-0.796018104
25055	Lipa	0.000415966	0.07419166	-0.404252942
140694	Dnm1	0.000421276	0.07419166	-0.377922804
84550	Slc24a2	0.000423054	0.07419166	-0.660483249
84416	Smpx	0.000435657	0.075428272	-0.422024479
306490	Mtmr7	0.000441133	0.075428272	-0.389759822
29738	Kcnab2	0.000459734	0.077638307	-0.409803636
29593	Ckmt1	0.000474956	0.079230767	-0.612479603
29599	Atp2b3	0.000497932	0.082062755	-0.511151363
81718	Cdo1	0.000526798	0.085786624	-0.44886022
83633	Gabbr2	0.000537646	0.086109801	-0.373162694
311254	Pdhx	0.000541373	0.086109801	-0.351974486
79210	Fstl1	0.000547811	0.086132247	-0.312907283
81733	Nell1	0.000558071	0.086748312	-0.458092973
117533	Gmpr	0.000600057	0.092226794	-0.463277522
50559	Acot1	0.000611429	0.092930374	-0.384285265
117018	Kcnh2	0.000621618	0.093440858	-0.453886512
54702	Egln3	0.000632166	0.093993526	-0.432469034
497874	RGD1565784	0.000639182	0.094014703	-0.372031639
499520	Shisal2b	0.000657895	0.094729917	-0.583627638
81730	Fez1	0.000688571	0.096967085	-0.446996784
29215	Arg2	0.00069222	0.096967085	-0.362039214
114113	Pafah1b3	0.000694698	0.096967085	-0.332720844
65199	Kcnip3	0.000723324	0.099942898	-0.580717672
64036	Cd55	0.000735097	0.100553915	-0.669890416
117556	Sv2b	0.000783134	0.106064242	-0.301160251
25434	Sparcl1	0.000817954	0.109694093	-0.363726137
24213	Atp1a3	0.000870832	0.115651594	-0.493194685
24596	Ngfr	0.000889084	0.116940173	-0.452674482
171109	Dusp5	0.000903787	0.117741961	-0.353923276
25332	Mgmt	0.000927648	0.119710402	-0.383879442
29237	Penk	0.00094968	0.121408167	-0.418514821
79245	Hsf1	0.000973513	0.122171419	-0.365829147
65152	Pfkm	0.000990376	0.123157768	-0.315340122
29686	Scn1b	0.001036984	0.126650886	-0.360393255
58950	Fkbp1b	0.001117548	0.134095943	-0.331605871
56780	Acpp	0.001146843	0.136414499	-0.418159444
24215	Atp2b2	0.001176514	0.138737427	-0.35129588
289197	Mgst3	0.001221726	0.142837563	-0.474308378
29737	Kcnab1	0.001236985	0.143395902	-0.320251848
24421	Gsta1	0.001280766	0.147223544	-0.40777079
102550903	Ufsp1	0.001314686	0.148738581	-0.648839119
24249	S100g	0.001315693	0.148738581	-0.557983
25739	Pygb	0.001346424	0.150895171	-0.361867874
682105	Reep2	0.001419809	0.152785467	-0.308410795
301334	Arhgef4	0.00142741	0.152785467	-0.603545829
24551	Mdh1	0.001435852	0.152785467	-0.361657968
297990	Ndufb6	0.001439881	0.152785467	-0.315267189
117520	Oxr1	0.001443889	0.152785467	-0.339569893
84587	Plcl1	0.001443918	0.152785467	-0.439051264
29639	Fxyd2	0.001452015	0.152785467	-0.392093449
25444	Fgf9	0.001477127	0.154241385	-0.324884619
83764	Flot2	0.001530448	0.156231371	-0.301301313
100910996	LOC100910996	0.001579091	0.159396587	-0.54622587
60377	Lin7b	0.001596413	0.159396587	-0.524297377
192245	Hspb6	0.001596413	0.159396587	-0.36983559
24258	Chga	0.00164894	0.163448197	-0.582869478
64533	Pnpo	0.001691194	0.166430564	-0.313487441
282636	Impa2	0.001713743	0.167444969	-0.414788438
192268	Gls2	0.001815341	0.176113853	-0.361256992
25265	P2ry1	0.001838978	0.176366324	-0.304172014
81869	Gstm7	0.00184373	0.176366324	-0.362353932
289233	Pex19	0.001877223	0.177093303	-0.373968279
29484	Slc3a1	0.001901393	0.178144861	-0.427998791
363972	Dpp10	0.001973396	0.18363319	-0.512197809
499745	Nrarp	0.002025359	0.185938801	-0.337812805
171039	Rph3a	0.002059849	0.18784454	-0.308372162
60341	Camkk1	0.002079601	0.18838981	-0.32786541
25495	Nog	0.002102263	0.189189836	-0.367404535
288753	Diablo	0.002139415	0.190032826	-0.398529038
315447	Chordc1	0.002207797	0.194841619	-0.331345703
59324	Kcnk1	0.002261559	0.19704373	-0.392611883
29564	Dync1i1	0.002282242	0.197443924	-0.364374131
79123	Asic1	0.002322347	0.197443924	-0.518425677
60577	Slc15a2	0.002323889	0.197443924	-0.340414474
314641	Pip5k1c	0.002481151	0.209115852	-0.398222571
58835	Phgdh	0.002515903	0.209115852	-0.330134286
64161	Pi4ka	0.002533692	0.209115852	-0.306817846
313052	Epb41	0.002537702	0.209115852	-0.347177997
296985	Clec2l	0.002581581	0.209759065	-0.549810123
116668	Myt1l	0.00260366	0.209759065	-0.316448322
29722	Apbb1	0.002616887	0.209759065	-0.418140666
116745	Kcnh6	0.002622898	0.209759065	-0.322027821
50664	Gnao1	0.002648096	0.209759065	-0.440065616
25522	Prkcz	0.002665235	0.209759065	-0.311415198
25248	Cnr1	0.002670453	0.209759065	-0.352290469
312166	Cadps2	0.002715446	0.21104882	-0.431692326
25484	Myo1e	0.002763709	0.21272241	-0.337884666
300726	Etfa	0.002783633	0.21272241	-0.317645115
24259	Chgb	0.002896598	0.217257011	-0.42533987
171574	Dnm3	0.002922384	0.217257011	-0.366163996
29179	Syn2	0.002922384	0.217257011	-0.312436849
25317	Fgf1	0.002941823	0.217520001	-0.304379507
303311	Rtn4rl1	0.003112871	0.225645851	-0.548795191
315728	Thsd4	0.003161388	0.226411642	-0.473859292
304735	Tmem177	0.003288512	0.233329796	-0.46995135
89791	Ncdn	0.003309159	0.233329796	-0.320537066
297525	Mkrn2	0.00334185	0.233724194	-0.355251766
24806	Tac1	0.003348925	0.233724194	-0.642183903
25297	Cacnb3	0.003558475	0.243381882	-0.355999584
64444	Isl1	0.003879447	0.260663707	-0.381022959
252960	Mrgprx3	0.00390643	0.260663707	-0.587040651
311866	Lrsam1	0.00390643	0.260663707	-0.540712121
286923	Dlgap3	0.003987933	0.264810381	-0.48052174
25012	Snap25	0.004237415	0.278540193	-0.334733556
362749	Dmac2l	0.004432621	0.286247848	-0.356517123
499349	Fgfbp3	0.004458276	0.286247848	-0.327421424
54296	Rgs7	0.004494348	0.286247848	-0.464885308
112400	Nrg1	0.004544507	0.286247848	-0.356015935
287606	Septin4	0.004552455	0.286247848	-0.385606265
499748	Rnf208	0.004603243	0.287236562	-0.462355572
25469	Kcna4	0.004640304	0.287236562	-0.31048561
314330	Cipc	0.004729197	0.291399479	-0.300366999
102556259	LOC102556259	0.004873224	0.296270336	-0.414845439
25315	Ephx1	0.005104072	0.304884698	-0.348245967
50871	Hpcal1	0.005153712	0.304904537	-0.312134013
116720	Pik3c2g	0.005207912	0.304904537	-0.319806966
84031	Chn2	0.005215854	0.304904537	-0.304461568
363285	Scly	0.005361453	0.306686297	-0.308625463
29145	Ctxn1	0.005436232	0.308556931	-0.413215715
288444	Hsph1	0.005596389	0.315032923	-0.348173446
81683	Mif	0.005717889	0.319073331	-0.325379493
360916	Tmem150c	0.00591759	0.325087222	-0.835209751
81728	Ndufv2	0.00628163	0.337379227	-0.337674507
170824	Steap3	0.00646598	0.339374422	-0.446711446
84409	Robo2	0.006532575	0.339374422	-0.338051503
289950	Pdhb	0.006554707	0.339374422	-0.317687413
689248	Ecscr	0.00657462	0.339374422	-0.456053236
140693	Plcd4	0.00657462	0.339374422	-0.407561099
687797	Tmem233	0.00657462	0.339374422	-0.646148207
309798	Gcc2	0.006745933	0.3434331	-0.401308095
81024	Ica1	0.006745933	0.3434331	-0.316837143
309525	Slc16a12	0.00677878	0.3434331	-0.337309208
83579	Gnb5	0.00677878	0.3434331	-0.435090856
29316	Adora2b	0.006846984	0.345608491	-0.356077133
50561	Resp18	0.006923858	0.346928414	-0.325102729
25507	Pcsk6	0.007183093	0.35472031	-0.319348862
499129	Kctd15	0.007301493	0.355434602	-0.364040749
688698	Ckmt2	0.007385143	0.356965962	-0.315409883
361824	Chchd10	0.00743412	0.357831249	-0.453397232
93667	Olfm1	0.007481522	0.357831249	-0.362569954
24530	Lcat	0.007875423	0.370808536	-0.363882676
291530	Ccdc68	0.00788839	0.370808536	-0.445062583
83627	Galnt5	0.007962142	0.372993635	-0.327052639
301388	Mfsd6	0.008155018	0.380725235	-0.344333209
100362155	Cyhr1	0.008231226	0.381677777	-0.301081858
29739	Gclm	0.008389451	0.385133081	-0.357927131
298496	Kcnq4	0.008545131	0.385133081	-0.517620974
25624	Vamp1	0.008557825	0.385133081	-0.415035672
25323	Htr1d	0.008587294	0.385133081	-0.352437633
680549	Pknox2	0.008707082	0.386701855	-0.393591833
252921	Tubg1	0.008744438	0.387104085	-0.321319482
361352	Slc66a2	0.008989742	0.394136795	-0.567184905
117596	Atp6v1b2	0.009235534	0.399787574	-0.307162496
78956	Scn9a	0.009461304	0.405709016	-0.463676802
306542	Brf2	0.009858324	0.417498505	-0.434802519
313510	Atpaf1	0.009906806	0.418142171	-0.380825127
25439	F2r	0.009935961	0.418142171	-0.311741139
498034	Fn3k	0.010097638	0.422402409	-0.407413781
25666	Dgkg	0.010381636	0.431642555	-0.304786433
362199	Vps39	0.010715694	0.43960278	-0.330155262
293864	Ubl4a	0.010733776	0.43960278	-0.387862125
681316	Tpbgl	0.010822707	0.441276291	-0.542774439
25673	Anxa5	0.011091643	0.449878324	-0.328924746
304822	Pkp1	0.011171133	0.449878324	-0.418732033
94203	Pgf	0.011272722	0.452198125	-0.311884913
500913	Shisal1	0.011455229	0.455511858	-0.377655185
291784	Rmc1	0.011547018	0.456507701	-0.365237788
79428	Luzp1	0.011639165	0.458824586	-0.403559899
497958	Gemin4	0.011827394	0.460853467	-0.449746034
680110	Rprm	0.011827394	0.460853467	-0.631195406
286920	Asic3	0.011927102	0.460853467	-0.314572319
83466	Celsr3	0.011960156	0.460853467	-0.386058411
81648	Crh	0.012009852	0.461246908	-0.421715541
25103	Chrnb4	0.012058236	0.461246908	-0.343380127
313917	Abhd1	0.012105245	0.461246908	-0.506685199
100909866	LOC100909866	0.012483558	0.468351307	-0.414921659
192251	Gpr149	0.012821057	0.472842422	-0.616803138
64508	Adcy3	0.01287587	0.472842422	-0.308394894
497986	Hoxb6	0.013139627	0.478023806	-0.412868855
312711	Pianp	0.013606623	0.486987138	-0.52597325
361672	Kndc1	0.013706415	0.486987138	-0.420185338
363449	RGD1560784	0.013756444	0.487498428	-0.364233727
300763	Lrrc49	0.013795599	0.487622728	-0.520467654
365823	Fstl5	0.014451475	0.497191839	-0.4113157
500105	Cntnap2	0.014451475	0.497191839	-0.545639858
85260	Entpd6	0.014620475	0.499252733	-0.415538397
362029	Agl	0.014879463	0.502558458	-0.396572067
25365	Actg2	0.015107255	0.508630231	-0.372259017
689074	Camsap3	0.015245753	0.511143778	-0.358205411
259243	Kcnip4	0.015563155	0.519240003	-0.413369746
29714	Ptprn2	0.01596104	0.529929757	-0.315498259
245982	Coro6	0.016418527	0.536333879	-0.512810684
309014	Plpp4	0.016809211	0.54012269	-0.377008982
306871	Dsp	0.016975166	0.54012269	-0.417828186
288151	Hoxd1	0.017074019	0.54012269	-0.403830056
361118	Prxl2a	0.01759042	0.546706489	-0.37416685
310640	Fam189b	0.01793048	0.548704784	-0.415156291
102555377	LOC102555377	0.018384716	0.55335376	-0.397905648
29477	Mapt	0.018852694	0.561685864	-0.301460105
56765	Plvap	0.01903992	0.561685864	-0.395131354
100360015	Car10	0.01903992	0.561685864	-0.600487747
291580	Minar2	0.01908674	0.561685864	-0.400940101
79433	Myh10	0.019499677	0.567523574	-0.340656939
64537	Hpse	0.019695028	0.570780263	-0.392164142
314897	Ppm1h	0.020096989	0.57285088	-0.321819209
305242	Cdkl2	0.020157198	0.57285088	-0.450024627
306790	Sema4d	0.020338349	0.57285088	-0.446604909
24602	Nppa	0.02035004	0.57285088	-0.410763386
289335	Susd4	0.02035004	0.57285088	-0.57797175
690285	Tmem223	0.02045955	0.57285088	-0.380680112
501582	Gspt2	0.021004956	0.57696143	-0.388065121
315036	Vps13b	0.021565988	0.58185632	-0.372481794
294565	Fam13c	0.021659776	0.582090523	-0.426194267
315059	Trappc9	0.022192808	0.590613658	-0.317540434
680080	Tomm5	0.022573052	0.596094157	-0.340162423
309828	Tspyl4	0.022969128	0.59960822	-0.492062746
296566	Clic3	0.023149248	0.60167506	-0.484621847
116489	Kcnk4	0.023862976	0.611276494	-0.442655733
317576	Ocrl	0.024278097	0.617268302	-0.378558901
361368	Large1	0.024278097	0.617268302	-0.345942935
25686	Gnai1	0.024535553	0.61922846	-0.382789893
293950	Morn4	0.024919721	0.622355493	-0.333960346
313244	Frmpd1	0.024932437	0.622355493	-0.377387783
363058	Cadm1	0.024932437	0.622355493	-0.413703729
291960	Hsf4	0.025254466	0.622393636	-0.461873662
25470	Kcna5	0.025388965	0.622393636	-0.483358879
140722	Caskin1	0.025586682	0.622904799	-0.458469155
499308	Flrt1	0.02624083	0.630355731	-0.375313017
310982	Ttll7	0.02624083	0.630355731	-0.545316984
114022	Glrx2	0.026752807	0.635332722	-0.320637568
306600	Atp11a	0.026894883	0.636496718	-0.334577349
295341	Ppm1j	0.027307927	0.644043338	-0.409902698
100361939	Rnaseh2c	0.02754884	0.646381778	-0.40417925
304503	Hectd4	0.028150853	0.651449682	-0.348728266
680282	Tceal5	0.0282027	0.651449682	-0.374304592
83589	Apba1	0.0282027	0.651449682	-0.344599387
301008	P4htm	0.028221651	0.651449682	-0.31838367
303786	Aifm3	0.028434556	0.651449682	-0.387000325
58827	Mest	0.028648228	0.652045115	-0.453669387
100912141	Tro	0.029221765	0.65852475	-0.331991231
362260	Dhx35	0.029510134	0.659642439	-0.373638732
313453	Tmem255a	0.030163707	0.6644273	-0.373140257
315579	Ubash3b	0.030163707	0.6644273	-0.465317322
305987	Dock5	0.030311806	0.665546056	-0.344396321
298517	Mrps15	0.030532105	0.669308764	-0.344964357
361454	Ccdc28a	0.030679395	0.671461521	-0.320451402
690333	Sertm1	0.030817185	0.672325788	-0.372384728
314465	Ppp1r13b	0.031197579	0.679540903	-0.432456096
300652	Sorl1	0.031470566	0.683310909	-0.480646017
102556249	LOC102556249	0.03157025	0.684388985	-0.437637083
140927	Selenbp1	0.03171991	0.685813072	-0.371111343
688843	Nap1l5	0.032123852	0.689830715	-0.353374261
366274	Ntsr1	0.032777041	0.69620675	-0.370185307
362919	Washc5	0.033005665	0.699632807	-0.309290885
683077	Pja1	0.033082057	0.699632807	-0.386933738
498819	Greb1l	0.033430135	0.704608347	-0.369039846
192276	Coro7	0.033682103	0.70773807	-0.329258529
291433	Dym	0.03385061	0.710187865	-0.391967728
300475	Adamts8	0.034083133	0.71179111	-0.368791818
291713	Rit2	0.034160388	0.712316983	-0.499678629
362323	Sdhaf3	0.034238042	0.71284959	-0.391411767
300839	Lysmd2	0.034471511	0.713544371	-0.427786043
313436	Zcchc12	0.034705736	0.715593713	-0.316726987
289716	Ccdc96	0.034736035	0.715593713	-0.367907704
678880	Rtl8b	0.034862306	0.715969282	-0.326769286
316003	Amigo3	0.0352552	0.717243101	-0.335546512
288743	Sgsm1	0.035388842	0.717243101	-0.365424369
287524	Rpa1	0.035967693	0.717243101	-0.330618646
307916	Jph3	0.036041552	0.717243101	-0.365387966
170914	Nap1l3	0.036041552	0.717243101	-0.438907639
171407	Gprasp1	0.03668697	0.719111041	-0.349775575
309156	Bbs1	0.036694167	0.719111041	-0.363782692
499073	Brsk1	0.036928236	0.72163048	-0.310472711
301887	Cdh12	0.037346686	0.72463165	-0.363529051
294231	RGD1302996	0.037346686	0.72463165	-0.494488417
501630	Pwwp3b	0.037999109	0.725551967	-0.362678125
54290	Rgs10	0.037999109	0.725551967	-0.479882786
116475	Ift172	0.038555879	0.730092064	-0.339456567
688502	Prmt8	0.038651436	0.730092064	-0.362549921
297453	Hdac11	0.038802903	0.731108689	-0.430654576
79253	Avil	0.039303668	0.736486122	-0.469542273
170546	Ryr3	0.039955803	0.742867993	-0.360654103
362465	Tmtc1	0.039955803	0.742867993	-0.408068938
316091	Pomgnt2	0.040384774	0.746056	-0.381081463
246258	Slc45a1	0.040607843	0.746144184	-0.356918188
116695	Kcnd1	0.040975127	0.747331684	-0.472250011
548106	Pcdhb19	0.041259788	0.751521483	-0.356649241
364224	Acyp2	0.041740121	0.754244539	-0.321091636
362826	Atcay	0.041911636	0.755883714	-0.356455824
287871	Rptor	0.04199661	0.755883714	-0.399164662
687633	Ube3b	0.042082271	0.756430209	-0.302360075
361836	Slc25a16	0.042563389	0.760702012	-0.355911046
307806	Thap11	0.043215046	0.766716745	-0.355808885
501146	Stradb	0.043464099	0.77013654	-0.379519998
363453	Ppp1r3f	0.043812858	0.773855119	-0.351939026
362122	Morn5	0.043866607	0.773855119	-0.354462985
289046	Tmem9	0.043900254	0.773855119	-0.314475788
60395	Trpc3	0.044162936	0.774648737	-0.320453777
291553	Nedd4l	0.04433847	0.774648737	-0.329080669
362095	Gtf3c5	0.045169442	0.776134376	-0.354192287
363153	Arpp21	0.046471895	0.790658021	-0.36609478
498398	Selenom	0.046560397	0.790835905	-0.363813951
309611	Vwa7	0.047122977	0.796780233	-0.353671641
314251	Sptb	0.048009342	0.804803665	-0.318791926
689256	Tpd52l1	0.048424856	0.808795607	-0.398862611
361018	Fam107a	0.049726351	0.822014594	-0.317642248
317232	Magee1	0.049726351	0.822014594	-0.350236341
361528	Ttc9b	0.049849958	0.822554375	-0.383670077
