# Supplementary material for: Analysis of Potential Hub Genes for Neuropathic Pain Based on Differential Expression in Rat Models
Source: Pain Res Manag. 2022 Mar 3;2022:6571987. doi: 10.1155/2022/6571987 (PMC8913144; doi:10.1155/2022/6571987)
Supplement: Supplementary Materials — Supplementary Figure 1. PPI network of DEGs from RRA analysis. DEGs, differentially expressed genes; PPI, protein-protein interaction; RRA, robust rank aggregation. Supplementary Figure 2. GSEA of candidate hub genes in the GEO dataset. (A) C, (E) and (G) GSEA of the single candidate hub genes in GO terms. (A) VOM2R75, (C) TJP, (E) FOXP1, (G) EXT1, and(B, (D) F, and (H) GSEA of the single candidate hub genes in KEGG pathways. (B) VOM2R75, (D) TJP, (F) FOXP1, and (H) EXT1. GEO, Gene Expression Omnibus; GO, Gene Ontology; GSEA, gene set enrichment analysis. Supplementary 1. Upregulated and downregulated genes obtained by RRA analysis. Supplementary 2. Top 50 genes with the highest connectivity. Supplementary 3. Enrichment of DEGs in the turquoise module in GO and KEGG pathways. Supplementary 4.Heatmap of the top 20 upregulated and downregulated genes identified by RRA analysis. Supplementary 5. Repeated measure ANOVA followed by Tukey's multiple comparison test was used to evaluate the paw withdrawal threshold (PWT) between the Sham and SNI groups in Figure 8(a) and Table 2. Supplementary 6.Expression of the five hub genes in the Sham and SNI groups measured using RT-qPCR in Figure 8(b) and Table 3. [file 6571987.f1.zip › 6571987.f1/Supplementary 2.txt]

ENTREZID	SYMBOL	connectivity
362481	Tox	342.0354204
100322884	Nemf	332.8355442
303348	Atad5	325.0740804
360865	Prrc2c	324.8782444
363018	Cep295	322.0459146
60442	Lin7c	320.319878
288620	Cct6a	319.7848071
291234	Mki67	319.6322661
307429	Dmxl1	314.4609588
140922	Txnl1	313.3898392
29578	Hnrnpa1	312.7678649
29581	Htr2b	308.2418463
313278	Ptprd	307.3648523
315634	Rbm7	306.6695728
297801	Xkr4	305.937042
689399	Cenpw	303.2336735
361967	Ppid	300.8604813
84006	Prkci	300.1827143
102556515	LOC102556515	298.321318
29150	Matr3	296.3410879
102555465	LOC102555465	296.0356017
50621	Slc23a1	295.7672055
171406	Prl8a9	295.6388657
102553883	LOC102553883	294.9096412
286986	Vom2r75	293.8074696
192209	Spdya	293.7722735
315969	Topbp1	293.4593938
292994	Tjp1	292.6016106
64029	Cabs1	292.4530769
299907	Ext1	288.9525296
501576	RGD1564534	287.4730504
305420	Anapc4	287.0816607
24656	Prl4a1	286.8818257
296049	Emc4	282.7799152
296750	Rint1	282.5759314
100361939	Rnaseh2c	281.4235677
309586	Trim26	280.7339012
299897	Trps1	280.6802795
366468	Lsm10	279.6364331
314265	Zfyve26	279.5361423
29200	Inhba	278.8479677
500037	Foxp2	276.976428
297480	Foxp1	276.5449419
311446	Hao1	275.5880951
309156	Bbs1	275.5076867
63866	Asic5	275.4193733
497894	Zfp62	275.3877992
310614	Gatad2b	275.1605914
316425	Sgo2	274.7920553
25694	Has2	273.9090075
680915	Mbd4	273.8423274
500992	Nxpe1	273.6191461
312444	Immt	271.6031416
691979	Esco2	271.5929312
361126	Sugp2	270.8170769
498819	Greb1l	270.2983588
29167	Dctn1	269.7723892
361746	Rfx3	268.5680601
295284	Rbm8a	268.3621585
102557324	LOC102557324	268.2278382
306720	Ctsm	267.6242848
309798	Gcc2	266.5998911
289278	Cox20	266.2944729
497860	Rpl39l	265.7862151
102556249	LOC102556249	265.2854993
290947	Mtrr	264.900454
313922	Asxl2	264.4687523
298496	Kcnq4	264.3297785
65180	Kcnd2	264.2361215
102555377	LOC102555377	264.10408
170546	Ryr3	264.0856391
307380	Piezo2	262.6757963
360596	Msi2	262.451727
500336	Clec1b	262.2296077
25276	Sycp1	262.1850783
83466	Celsr3	262.0737691
362260	Dhx35	261.7797477
116508	Nrxn3	261.6569026
689770	LOC689770	261.5835426
286989	Ugt2b7	261.3115068
245955	Lgals3bp	261.0896743
83764	Flot2	260.6077218
25047	Fcer1a	260.5502814
100360342	Msh6	260.3988367
83820	Sycp2	260.3658846
293653	Acy3	259.5907598
114489	Dag1	259.0304192
303287	Fbxo39	258.5911638
300980	Dusp7	258.494039
287974	Klhl6	256.9337219
305120	Rpap2	256.6551269
24777	Slc10a1	256.563632
25459	Hmgb1	256.2354617
294924	Mecom	255.9432078
361354	Fbxo15	255.824975
680478	Lrrc19	255.0113426
362826	Atcay	254.8556803
307806	Thap11	253.8710704
313521	Hpdl	253.735723
293294	Trim6	253.1630227
24687	Prp15	253.0965367
309170	Fam89b	252.6834859
81745	Pdpk1	252.5072477
114111	Vegfc	250.6851497
25675	Hmgcr	250.53721
360692	RGD1563888	250.1855702
102547254	LOC102547254	250.1142511
257643	LOC257643	250.0409276
24609	Odc1	249.9023846
497039	Amy2a3	248.9438934
499015	Serac1	248.8899961
502902	Clec7a	248.6250725
50864	Ntm	247.9124784
24867	Smr3b	247.8570531
100909793	Smim18	247.728013
292584	Fiz1	247.4147414
311865	Ptges2	246.5999932
501146	Stradb	246.5232829
680076	Asb14	246.4542889
24309	Dbp	246.0133376
501582	Gspt2	245.8225228
301363	Map4k4	245.2143363
64194	Insig1	245.1626357
246334	Tp63	244.8331453
362214	Nop56	244.6608411
297824	Dpy19l4	244.1565909
64550	Top1	243.8556328
497914	Med9	243.7510894
246258	Slc45a1	243.0160332
102555617	LOC102555617	242.9867798
293864	Ubl4a	242.7227894
114517	Itga6	242.6946235
314259	Mpp5	242.6438621
79256	Hnrnpd	242.0061649
25013	Semg1	241.9983058
316561	Sphkap	240.8858777
245958	Atp5f1e	240.6174904
502782	Pyurf	240.3876765
171407	Gprasp1	240.1739412
366300	Pcmtd1	239.7417355
293719	Ubxn1	239.6336947
83632	Deaf1	239.5733491
25668	Cd38	239.4266472
306542	Brf2	239.329796
102546784	LOC102546784	239.2052276
302022	LOC302022	238.8044478
678880	Rtl8b	238.7687215
306117	Tbc1d4	237.6621875
100364165	Nktr	237.6589955
114022	Glrx2	237.0652961
24206	Apeh	236.6824941
84114	Agps	236.4430505
499129	Kctd15	235.9631876
100361923	Ikzf4	235.61952
315496	Dpy19l1	235.4754561
24479	Idh1	235.3790193
81918	Pard3	234.2516851
690538	Scai	234.2226449
291960	Hsf4	233.9503709
304735	Tmem177	233.8060923
499748	Rnf208	233.786194
24855	Tsc2	233.3852157
362115	Niban2	233.1124557
497958	Gemin4	232.6038396
246311	Pdp2	232.3865608
314711	Spic	231.8468308
170577	Mark3	231.688125
689248	Ecscr	231.620728
499801	Ifih1	231.5466853
29227	Nfib	231.5036124
313604	Zmym1	230.7842707
83718	Clic4	229.6212539
65165	Tmed2	229.5247503
690441	Atp5mf	229.334364
29361	Sox10	228.9216227
301164	Kat2b	228.7926591
286985	Vom2r31	228.7145428
361975	Lrba	228.5546071
301334	Arhgef4	228.5491764
117095	Bhlhe41	227.7313003
84486	Sf3b1	227.6912777
303547	Ezh1	227.3155191
24552	Me1	226.9977381
84014	Ralbp1	226.7576897
314300	Riox1	226.0991525
365018	Zcchc14	226.0885301
296566	Clic3	225.6994433
25413	Cpt2	225.6769076
310640	Fam189b	225.44963
303000	Capn15	225.3878385
313917	Abhd1	225.1437447
314013	Trappc12	225.0417723
300850	Gsta4	224.7837514
80338	Zbtb10	224.5750372
57033	Adam22	224.5107371
24551	Mdh1	224.3244912
304822	Pkp1	223.8813857
117019	Eif2b4	223.88087
499156	Gas2	223.8384701
306819	Kdm1b	223.6845403
362095	Gtf3c5	223.5115722
84497	Dgat1	223.4010314
406230	Rpp21	223.372178
497874	RGD1565784	223.1615368
286954	Ugt2b17	223.0699979
310005	Aggf1	222.8508623
306424	Mfap3l	222.7268441
314856	Mdm2	222.2380209
192276	Coro7	222.2156549
362702	Lclat1	222.168297
306587	Tcta	222.1064268
297971	Smim8	221.2115841
287962	Mrpl40	221.0565183
81738	Nup98	220.8095381
24434	Gusb	220.1516985
296913	Lsm8	220.1320962
680080	Tomm5	220.0545539
24602	Nppa	220.0505307
102549347	LOC102549347	219.7904889
25612	Asns	219.6864301
64511	Fntb	219.6815122
58838	Sh2b3	219.6619506
691001	Ndufa3	218.9733678
114520	Strn3	218.837652
360467	Tvp23a	218.7946777
65248	Prkaa1	218.4765641
680928	LOC680928	218.1306933
102551615	LOC102551615	218.0558171
287847	Rbfox3	216.1986801
297566	Atp6v1e1	216.0286846
50938	Cdon	215.9517298
288416	N4bp2l2	215.8460165
24831	Thrb	215.7200401
679135	Slc25a53	215.6649455
300811	Bnip2	215.418845
502970	Angptl3	215.1435436
293950	Morn4	215.1335746
298483	Lao1	215.0381956
84379	Rab6a	214.78906
317576	Ocrl	214.4019919
311204	Slc35c1	214.0146112
29435	Ssr4	214.0063948
366697	Sptlc2	213.7767516
691145	Immp1l	213.694009
24416	Grm3	213.5655504
361387	Zfp330	213.5472272
314641	Pip5k1c	213.1040705
293725	Eef1g	213.0414578
289717	Tada2b	212.9142927
288271	Mrap	212.5633389
310935	Fpgt	212.4887665
64314	Casp2	212.418631
362609	Pum1	211.0919715
81647	Atf2	209.8652965
287871	Rptor	209.5034912
310250	Zfhx4	209.0499668
84595	Nucb1	208.9652243
296612	Med27	208.6465317
65183	Aldh3a2	208.4111137
641520	Popdc3	207.9817618
289565	Arl9	206.9835408
312227	Cnot4	206.6722205
24655	Plcd1	206.4916039
117027	Ccr3	205.8738061
100910996	LOC100910996	205.2165012
24565	Abcc1	204.9134666
310958	Zzz3	204.8747294
170824	Steap3	204.6693923
310288	Hps3	204.6370386
54230	Btg3	204.1165287
102552880	LOC102552880	203.5223095
25179	Idh3g	203.499028
287368	Nt5m	202.6892622
364183	Bloc1s4	202.090702
307035	Mpp7	201.767077
63996	Smc1a	201.6012778
360845	Zc3h11a	201.390758
80846	Hnrnpl	200.8983961
366431	Tceanc2	200.7238432
302192	LOC302192	200.6182257
25705	Zeb1	200.5879527
102554630	LOC102554630	200.0957121
246757	Klhl17	199.7282955
362724	Sh3yl1	199.5300685
298517	Mrps15	199.5107506
290303	Spryd7	199.4534834
361528	Ttc9b	199.2491497
360480	Cdip1	198.5203923
303605	Strada	198.4993637
308906	Trim5	197.7936284
78982	Tas2r114	197.7702252
681210	MGC94891	197.1527758
287564	Tmem132e	196.9927755
687694	Elp4	195.8287477
361018	Fam107a	195.7095057
140927	Selenbp1	195.6264703
295160	Mnd1	195.5147878
50685	Myl12b	195.4888048
29145	Ctxn1	195.4459674
64191	Dhcr7	195.3729594
81661	Gmfb	195.3191816
296558	Anapc2	195.2772984
171145	Eif2b3	194.6650813
362053	Clca4	194.2539067
24891	Abcb4	194.1479355
688749	Tulp3	194.0209838
58940	H2az1	193.994171
364405	Scara3	193.7412271
360502	Fam234a	193.6920999
363041	Pate4	193.4110656
102547703	LOC102547703	193.04741
304721	Pdxdc1	193.0301677
25470	Kcna5	192.9165727
60590	Grm8	192.7872602
24252	Cebpa	192.6718605
362945	Lrrc24	192.3495393
29223	Ak4	191.9591108
246248	Fmo5	191.9449575
29598	Atp2b1	191.6936971
24530	Lcat	191.3274082
361588	Lrrc28	191.1385239
54315	Ucp2	191.137047
100909598	Pigbos1	191.1303881
266682	Cyp3a2	191.0736695
117045	Eif4e	190.9812842
287746	Fmnl1	190.9053685
25714	Myf6	190.6349624
100360464	Arxes2	190.5424012
100362324	Dhx29	190.4591489
102555751	LOC102555751	190.1958907
292625	Crxos1	190.0686854
361663	Lhpp	189.7561747
114105	Cxcl2	189.6750592
140581	Patj	189.6626369
681123	Tomm6	189.5406494
102546688	LOC102546688	189.3814779
170899	Kcnk2	189.2703964
170670	Hadha	189.1224535
305242	Cdkl2	188.9273834
29714	Ptprn2	188.8126467
681316	Tpbgl	188.4922853
499655	Cks1b	188.4680299
286934	Havcr1	188.1248704
29154	Capn2	188.0647429
303772	Slc16a6	187.8284102
114091	Fcnb	187.7617286
296167	Pank2	187.6429879
305987	Dock5	187.4753797
373542	Stk25	187.3794892
290999	Higd2a	187.3781984
619550	Gpr153	187.3508821
291295	Rbm17	187.2969523
361767	Poll	186.8771303
93646	Sec31a	186.5048123
303602	Dcaf7	186.3145086
291553	Nedd4l	185.8104966
360977	Tbrg4	185.2440485
362768	Ttc7b	185.1863401
312912	Prex2	184.9020459
300989	Hemk1	184.8447481
65262	Atp5f1a	184.5139856
300870	Tent5a	184.5088812
298765	Zfp36l2	184.2664188
24797	Sst	184.1518152
100910792	LOC100910792	184.0128752
114633	Plce1	184.0085729
116744	Lpar1	183.8190962
113984	Nr2f2	183.7327181
497811	Xdh	183.3193786
361266	Akr1c13	182.9034785
308444	Axl	182.5892566
314462	Trmt61a	182.570121
54227	Arpc1b	182.5651946
289997	Dlgap5	182.4969969
297525	Mkrn2	182.3990221
60331	Atxn3	182.3709633
498709	Cks2	182.2900497
83499	Psmd4	182.0968267
360673	Tepsin	182.0647332
102546943	LOC102546943	181.9474196
63864	Hsd17b10	181.7194861
689589	LOC689589	181.6658207
100360205	Palld	181.6432649
314465	Ppp1r13b	181.565625
680404	C1ql3	181.4105362
192241	Atp5po	181.2475025
300018	Lynx1	181.1998532
24446	Hgf	181.021109
79463	Timm22	180.7600533
29721	Hivep2	180.2005968
64828	B4galnt1	179.9307162
29580	Fdft1	179.5594265
315484	Bbs9	179.5552456
291784	Rmc1	179.5248937
498910	Arl2bp	179.4681913
286920	Asic3	179.398618
362711	Tmem214	179.3974101
100910424	LOC100910424	179.2147002
294207	Ppp1r11	179.1752959
291926	Mylk3	178.9531288
689256	Tpd52l1	178.9174611
84583	Rgs2	178.393298
361824	Chchd10	177.8832564
498690	Ctla2a	177.4882875
688459	LOC688459	177.3734601
310810	Frrs1	177.2925804
192225	Spata7	176.8896546
290364	Itm2b	176.4956497
50655	Aco1	176.4489949
246760	Mafk	176.4426949
361066	RGD1308117	176.4379747
361848	Ddx50	176.3062282
290641	Rpl18a	176.2268958
311456	Mkks	175.7014861
287822	Hid1	175.6725604
60465	Cttn	175.472993
83800	Clta	175.4610568
363272	Pde6d	174.7903339
25341	Tnfrsf11b	174.6091643
303607	Ddx42	174.5939846
29373	Bmp2	174.438698
29333	Cd46	174.2565791
246280	Slc15a4	174.1323889
297768	Lactb2	173.1821641
116598	Pdia4	173.1707798
192275	Dad1	173.1612123
498038	Vgll3	173.1586512
301514	Bcs1l	173.0313223
113937	Clec2d	173.0196489
294565	Fam13c	172.8543272
100362548	Elp3	172.760131
687713	Gucd1	172.6681519
29402	Unc119	172.5972185
304529	Vsig10	172.5322992
311494	Rin2	172.3705574
266600	Csdc2	172.2512371
29215	Arg2	172.2172773
362650	Fblim1	172.1308241
252858	Frmd4b	171.9181637
29610	Tgfbr3	171.6635341
299604	Polrmt	171.1894626
305236	Cxcl11	171.094434
548106	Pcdhb19	171.0908734
361502	Ppp6r1	171.0251947
687633	Ube3b	170.7485979
295243	Krtcap2	170.4097671
170929	Bcl2a1	170.3564146
308336	Zfp580	170.2349341
83616	Trim3	170.0524761
315912	Tbc1d8b	170.0377778
641316	Aldh4a1	169.8617007
100910237	LOC100910237	169.3844853
300228	Lima1	169.019312
25528	Sirpa	168.9121713
100910751	Mtg1	168.7356421
293476	Xpo6	168.5406941
497986	Hoxb6	167.9803407
290370	Dnajc15	167.9126154
362919	Washc5	167.6120058
362191	Dph6	167.5438871
29214	Tubb5	166.8923209
361110	Tmem110	166.7966318
293702	Fkbp2	166.7599074
362930	Ptp4a3	166.507256
362624	Selenon	166.4555334
114495	Map2k6	165.9760043
140866	Dgka	165.8965978
361384	Dnajb1	165.7998084
93667	Olfm1	165.6150662
100910342	Bbip1	165.4431374
297029	Gstk1	165.2065433
29366	Serpine2	164.7131826
116550	Atp5f1c	164.6052427
313089	Slc7a13	164.2011794
297123	Fkbp9	163.4844752
307376	Onecut2	163.3435188
64154	Gosr2	163.2839207
296710	Arpc5l	163.2224218
81814	Tmsb4x	163.1758165
245965	Atp5f1d	163.0583575
140720	Baalc	163.0267581
24650	Pkd1	162.9457896
282817	Pycard	162.7250626
94203	Pgf	162.7187848
315708	Edc3	162.6469628
688786	Pet100	162.4215524
259246	LOC259246	162.3847362
360417	Ptprq	162.3551948
314612	Shc2	162.2907794
302981	Spsb3	162.2036136
54294	Rgs5	161.5309149
500917	Odf3b	161.4133585
309611	Vwa7	161.2668824
25600	Utrn	160.8632794
29699	Prkar2a	160.8208191
290381	Vwa8	160.7363145
50560	Ip6k1	160.1311854
314999	Trmt12	159.9096419
25595	Map2	159.8501566
81504	Grb2	159.658194
297437	Txnrd3	159.4350865
292148	Eif3a	159.1035961
81757	Rala	158.9594571
683077	Pja1	158.8964319
293632	Ifitm10	158.8385645
314273	Dcaf5	158.7180109
685888	Sdhaf4	158.5593195
24418	Grm5	158.4283715
116489	Kcnk4	158.2438978
289046	Tmem9	158.1324302
29479	Odf2	157.9183004
114113	Pafah1b3	157.7829113
124323	Rps23	157.4909277
300475	Adamts8	156.7561018
83809	Nsfl1c	156.6694791
291129	Nrsn1	156.6338439
25683	Col12a1	156.4833383
498982	Myb	156.4505909
362706	Rbks	156.2315711
305340	Rbm47	156.1623777
299732	Lta4h	155.8980352
366466	Maneal	155.6744618
361256	Svil	155.6339058
362636	Usp48	155.5288221
117184	Ctrl	155.4385286
361673	Ifitm3	155.397671
192350	Cdk12	155.1634149
361301	Tpgs2	155.1179984
25112	Gadd45a	155.1133282
64633	Rab5a	154.8941963
100360417	Rusc1	154.7460538
293129	Alg8	154.7029342
63867	Ugt2a1	154.6340773
25687	Cald1	154.3228629
58842	Preb	154.3223181
29741	Pik3r2	153.9061137
303292	Ankfy1	153.8238617
362323	Sdhaf3	153.7875589
100911508	LOC100911508	153.7341789
366205	Flrt3	153.7032654
288075	Stfa3	153.6573567
360426	Pla2g6	153.4144367
312711	Pianp	153.2598707
29644	Ptpn5	153.2420161
294288	Cuta	152.7001674
29211	Sptbn2	152.6630245
690229	Wdr74	152.5484605
102549076	LOC102549076	152.2912192
64533	Pnpo	151.8808754
116555	Nup107	151.8284226
286923	Dlgap3	151.8135367
314655	Adamts10	151.7899924
687029	Ss18l2	151.7259855
170751	Xpnpep1	151.6469109
501145	Satb2	151.4878048
304929	F5	151.3585334
363285	Scly	150.9481851
81925	Cds1	150.7162416
192204	Ehd4	150.6927374
24648	Serpina1	150.6785782
499422	Gstt3	150.3489106
288238	Pigp	150.2195255
362436	Gpr162	150.1729933
79558	Acvr1	150.0889296
361834	Cabcoco1	149.6656292
81816	Ube2b	149.5943679
307398	Arhgef37	149.4339935
116664	Atp6v1f	149.410618
29156	Capns1	149.0353128
288272	Mis18a	148.9740706
288671	Anapc5	148.9117944
365042	Rab32	148.6654621
24516	Jun	148.6357037
65178	Snap91	148.6004279
316737	Lpin2	148.5458725
29357	Smad2	148.237263
305332	Limch1	147.976667
24605	Nras	147.1740425
117552	Ptpn23	146.823107
192154	Hip1	146.7946061
81683	Mif	146.4457172
64508	Adcy3	145.8458166
25165	Zfp386	145.6210454
309674	Rrp1	145.5686931
24392	Gja1	145.5361489
291567	Ppargc1b	145.5305963
296368	Ube2c	145.4756074
102555246	LOC102555246	145.4688948
102547184	LOC102547184	145.4559021
25522	Prkcz	145.354906
414819	RT1-CE16	145.0199935
288744	RGD1306556	144.9372165
361352	Slc66a2	144.8789247
25648	Slc7a1	144.4769567
300795	Pclaf	144.2639344
60391	Nrxn1	144.1015937
94202	Ptprr	143.9315079
305164	Wdfy3	143.6980044
289219	Ppox	143.262076
24472	Hspa1b	143.1669272
25417	Dpysl4	143.1201539
25578	Ywhaz	143.0672534
305956	Wdfy2	142.941491
314417	Papola	142.6452152
499256	RGD1559600	142.0115586
116552	Plod1	141.7597626
287805	Gprc5c	141.3769835
315036	Vps13b	141.2522831
311671	Npepl1	141.1289603
81650	Csnk2b	141.0594992
94194	Cox5b	141.008913
65160	Clns1a	140.9249632
80841	Fabp7	140.9127508
300754	Bbs4	140.8611264
64134	Xylt2	140.611578
79248	Abca2	140.189893
29667	Srsf5	140.0273229
689043	Tafa4	140.0158014
29709	Gabrg2	139.9435242
84431	Asah1	139.7493626
85255	Hacl1	139.7451056
140668	Abcc3	139.5335134
366274	Ntsr1	139.5086227
25736	Kcnb1	139.3722201
296851	Pon2	138.9401345
155423	Anxa7	138.8997958
24437	H1f0	138.7537816
65274	Nup62	138.7327428
56084	Hgs	138.6805153
364755	Ero1b	138.450493
288667	Fam216a	138.4300847
58971	Fxyd1	138.3892704
295325	Igsf3	138.1384483
309159	Klc2	137.9449093
64312	Aplp2	137.0603522
54243	Cr1l	137.0503476
170573	Slc38a4	136.9332827
94273	Mgat2	136.8829677
25507	Pcsk6	136.6609523
360958	Ablim2	136.5947279
102548228	Bivm	136.3572134
266803	Sostdc1	136.3478855
24421	Gsta1	136.2679395
171361	Eef1a1	136.137759
25274	Tst	136.0605463
304503	Hectd4	136.0352018
689226	Ube2r2	136.0008983
498353	Scfd2	135.990048
252917	Nr1d1	135.9827756
79117	Arf5	135.7100289
25541	Scp2	135.7023793
362681	Pusl1	135.6275213
245903	Magi3	135.5443552
29542	Pebp1	135.4641543
100911462	Txnl4a	135.4155167
681896	Slc25a18	135.0409747
26192	CYTB	134.8354053
25642	Cyp3a23-3a1	134.5178825
102550903	Ufsp1	134.4958445
25282	Cox6a1	134.3639386
24933	Klra22	134.025514
25363	Acadvl	133.9174734
293614	Ric8a	133.7363616
100361133	Mycbp	133.5107874
81717	Ctbp2	133.2320325
24917	Kpnb1	133.0848075
102554796	LOC102554796	133.0570485
59318	Negr1	132.8659792
289716	Ccdc96	132.8593845
365407	Cpsf7	132.5343111
295252	Ube2q1	132.2737438
24377	G6pd	132.1668238
309301	Rcl1	132.1193044
685451	Gng13	132.1012608
100911038	LOC100911038	131.833483
681996	Ahsa1	131.7134786
114901	Sorbs2	131.6756824
29448	Rab7a	131.6308722
289353	Slc30a10	131.2474952
24258	Chga	131.0741839
116640	Tnc	130.9172451
307916	Jph3	130.8721662
363064	Wdr61	130.3631108
84424	Tle3	130.3336489
363448	Dynlt3	130.3231591
366403	Fam29a	130.2216152
117543	Decr1	129.8715599
314251	Sptb	129.8325765
245982	Coro6	129.7217309
25135	Ncl	129.0417858
298490	Ppcs	129.00966
113907	Sbk1	128.8341224
303564	Tmem101	128.7975007
89828	Chl1	128.6326742
499308	Flrt1	128.5869044
304543	Mlec	128.4637141
117557	Tpm3	128.3627983
287361	Zfp496	128.2692471
84382	Tcf4	127.9353973
64507	Fmod	127.9274088
84007	C3ar1	127.8048756
305685	Comtd1	127.5008558
79245	Hsf1	127.3148589
338401	Crip2	127.2520427
29743	Slc25a1	127.1355735
171347	Mat2a	126.8821992
287427	Trappc1	126.6026294
114851	Cdkn1a	126.512349
25565	Tle4	126.3354795
100909866	LOC100909866	126.2878619
58924	Fut2	126.0943332
25700	Ide	126.0602044
100911757	Tshz2	125.9948607
245959	Slc25a3	125.9438814
304244	Fry	125.557459
25136	Gfra2	125.5262323
310131	Rictor	125.4845507
24494	Il1b	124.9685143
316226	Klc4	124.7865839
24191	Aldoc	124.7787008
81768	Rpl22	124.7253717
50594	Nbl1	124.5812833
300079	Rpl3	124.4865799
24950	Srd5a1	124.484947
290651	Isyna1	124.3996396
29240	Polb	124.19006
313977	Lpin1	123.9840172
81024	Ica1	123.5956808
252827	Cdk5rap1	123.5744788
312503	Smyd5	123.4095163
24949	Syn1	123.3928172
246115	Plpp2	123.3440067
64573	Trpc2	123.1302983
246136	Man2c1	123.0105854
690285	Tmem223	122.8520479
50687	L1cam	122.5347212
25237	Acvrl1	122.2580702
293526	Ate1	122.1052365
192179	Gpm6b	121.9202751
56718	Mtor	121.6552512
299802	Lgr5	121.4402616
113912	Rtn4r	121.0799155
306817	Dek	120.9690557
499780	RGD1561113	120.9072745
113947	Maged2	120.7625728
500420	Tstd3	120.7517935
690050	Tpmt	120.5692857
24183	Ak1	120.5153776
315341	Hoxc5	120.434991
681665	Ints6l	120.0181687
680751	Ebf4	119.7602262
79244	Hsd17b4	119.7555024
83807	Ybx3	119.7256325
25246	Bsg	119.6834952
117515	Septin2	119.4953405
26759	Acot7	119.1237395
309262	Nsdhl	119.035273
58962	Hpgds	118.9599079
25291	Anxa3	118.9331475
286958	Np4	118.8627352
498392	Cytl1	118.7956503
299154	Churc1	118.5950029
29360	Selenop	118.5692692
102555086	Crtap	118.5455655
313974	Trib2	118.2969957
307649	Ciapin1	117.8252739
81670	Gpt	117.8082313
367302	Kcne4	117.8016779
361402	Prmt7	117.6751802
116722	Psmd10	117.5699834
64161	Pi4ka	117.1687337
25296	Bmp4	116.9526025
25731	Syt3	116.9257757
690987	Gys1	116.8325556
29468	Pdia3	116.7883244
308834	Usp35	116.7497549
287608	Supt4h1	116.5536262
64156	Uba52	116.5225863
286978	Tmsb15b2	116.3961533
301013	Shisa5	116.3012176
689788	Prdm5	116.2655004
361857	Traf3ip2	115.8078143
64307	Rpl24	115.6121365
308690	Ndn	115.5471565
24804	Syp	115.2167731
100911177	LOC100911177	115.0676627
81728	Ndufv2	114.9705081
81674	Gtf2f2	114.788064
140568	Chst10	114.6781884
498225	Eif2d	114.486127
291403	Zadh2	114.3378104
499847	Prrg4	114.1645513
100302453	Mettl9	113.8600464
362134	Mmadhc	113.827443
295483	RGD1306704	113.7227151
306630	Abhd13	113.7113589
25256	Fmo1	113.6670053
289388	G0s2	113.5721264
313906	Zfp512	113.4705923
64373	Rhob	113.0735372
246245	Fmo2	113.0243381
301529	Dnpep	112.9700716
304900	Astn1	112.9076146
289934	Oxsm	112.7663021
24225	Bdnf	112.7582142
300114	Rtl6	112.7011019
360819	Suds3	112.0583716
171341	Mgst1	112.0078931
301008	P4htm	111.9708331
252854	Slc5a11	111.9265354
366619	Dtd2	111.727564
304833	Ro60	111.4175463
246185	Dus1l	111.4089666
117044	Rraga	111.3102097
25332	Mgmt	111.0997189
54296	Rgs7	110.9340363
293019	Arrdc4	110.8273761
691657	Crip1	110.6839822
64313	Oat	110.6593313
304542	Coq5	110.4471313
192245	Hspb6	110.1578163
287643	Spop	109.5461447
316201	Daam2	109.46791
81754	Rab1a	109.3404554
54305	Sstr2	109.0832194
24251	Cd53	109.0131353
287299	Mfap3	108.9930356
289777	Fignl1	108.9590156
361005	Chchd1	108.7098903
308405	Dmpk	108.595349
102552909	LOC102552909	108.5875007
683626	Lbh	108.4526894
25283	Gclc	108.3899499
308708	Ttc23	108.381298
246303	Serbp1	107.9967358
361735	Ms4a6a	107.651557
171070	Ptpn21	107.458619
361836	Slc25a16	107.4063085
311847	Dolk	107.3777062
363165	Csrnp1	107.3541418
309201	Rom1	107.3292177
292554	Aurkc	107.1876136
362971	Mpped1	106.8321144
361118	Prxl2a	106.7886496
361443	Ntpcr	106.7284975
311218	Accs	106.4822944
300687	Bud13	106.2323556
291885	Mcm5	105.9875185
361425	Emc8	105.8736324
362556	Ttc4	105.5295658
25236	Gpc3	105.5057596
24800	Sts	105.1787877
291530	Ccdc68	104.7845429
81783	Ssb	104.3838597
365458	Fra10ac1	104.1492651
362783	Eml1	104.0867049
296267	Snph	103.9228437
287525	Smyd4	103.916498
100912141	Tro	103.8853108
50561	Resp18	103.8605565
289783	Zmiz2	103.6078582
307350	Afg3l2	103.3937834
56785	Ralgapa1	102.829061
94188	Zfp423	102.7209013
24158	Acadm	102.6860383
687090	Tprg1l	102.416167
362251	Rbm39	102.3957863
315447	Chordc1	102.3159551
314897	Ppm1h	102.2258184
116665	Rere	101.8217954
89786	Cox17	101.7904638
306607	Tmco3	101.6430683
192203	Fap	101.6385874
680282	Tceal5	101.494509
317630	Bloc1s6	101.3460963
314380	Tdp1	101.3262767
50692	Plaur	101.1741868
303831	Eif4a2	101.1400999
303179	Guk1	100.7244198
300741	Mpi	100.6141071
500233	Exoc6b	100.2091635
114029	Megf8	100.0652329
246327	Prim1	100.0165391
498256	Ier5	99.91607258
316249	Enpp5	99.88388149
24852	Tpm4	99.78134582
65096	Adgrl1	99.60357501
432360	Sgce	99.49687801
25484	Myo1e	99.25664556
303353	Psmd11	98.5671598
29700	Pcbd1	98.16035262
314432	Uba1	98.11766928
94197	Rab14	97.80896629
308777	Ap3b2	97.54897264
361921	Ect2	97.49428843
308701	Tars3	97.3070715
100360682	Snrpe	97.17935826
100364984	Rab37	96.93684572
29318	Ddt	96.78667962
25589	Kdr	96.67938103
113959	C5ar1	96.49693985
50599	Kcnj3	96.46942286
65151	Rida	96.21131662
54190	Rabep1	96.18496529
304914	Rabgap1l	96.13372353
65137	Ruvbl1	95.94660584
54267	Maf	95.86346964
64519	Entpd1	95.8009075
100911506	LOC100911506	95.66554021
498416	Grb10	94.98618822
302422	Pdzd11	94.83814018
58920	Gpc1	94.80980438
292673	Ercc1	94.75110776
25603	Marcks	94.72436098
681219	Cox14	94.61315157
24834	Tk1	94.33265007
170698	Slco1a4	94.2303753
191574	Akr1c14	94.22387685
314374	Foxn3	93.86964017
307008	RGD1308147	93.8121786
25508	Pam	93.808241
79210	Fstl1	93.30247756
297453	Hdac11	93.0943873
309499	Myof	92.96251148
29338	Prdx2	92.80136604
306790	Sema4d	92.65300653
117556	Sv2b	92.59406365
312703	Pex5	92.3983183
246120	Plbd2	92.31014001
29527	Ptgs2	92.28183917
29411	Ppt1	92.16943532
56765	Plvap	92.03567794
83576	Sort1	91.93110443
25439	F2r	91.8799271
297372	Mrpl19	91.50697178
287126	Mrps34	91.435083
362701	Capn13	91.36570957
291597	Trim36	91.25611618
289733	Pla2g3	91.15415615
361102	Polr3a	91.09748496
116510	Timp1	90.79362909
300668	Dpagt1	90.59378074
690769	Znrf1	90.52771453
192253	Myo16	90.24476099
305571	B3gnt2	90.20515579
171408	Dcxr	90.15837159
116543	Ebf1	90.04793731
29707	Gabra5	89.64203713
361944	Elf2	89.56120736
24560	Cd200	89.55687827
29510	Pctp	89.45560541
312787	Gpr19	89.19968061
84577	Hdac2	89.18327333
25652	Ptgfr	89.0893661
56082	Gorasp1	88.9939752
25243	Arnt2	88.78414372
691853	Cox10	88.04050823
170465	Acaa2	87.82627565
362862	Hsp90b1	87.7642767
245980	Nr2f6	87.72682717
102551349	LOC102551349	87.6385002
308757	Man2a2	87.57996106
362203	Tubgcp4	87.48004978
619558	Retreg1	87.07766189
54242	Cpa3	86.6312407
362248	Procr	86.41563021
114490	Cited2	86.22511791
25304	Comp	86.15942837
502317	Aplp1	86.10470021
500901	Arhgap39	86.01954762
29701	Scn11a	85.95436687
291031	Fam8a1	85.93320414
680987	Ciao2b	85.93095818
498333	Bmp2k	85.66991857
499520	Shisal2b	85.62623672
294088	Pank1	85.56602597
81519	Mgat1	85.29650309
500446	Phf24	85.28221971
308939	Ipo7	85.19360292
316406	RGD1306941	85.09214776
25365	Actg2	84.98633449
313510	Atpaf1	84.94390994
316426	Spats2l	84.71862044
29409	Mag	84.6539416
171121	Ppp6c	84.59663793
307585	Cables1	84.3458239
29640	Dpm2	84.25205493
24207	Apoc3	84.25187418
362837	Ndufs7	84.11221373
29672	Psma5	83.98484288
25055	Lipa	83.90964726
29390	Ptpmt1	83.84524908
25352	Sod3	83.45901708
84026	Dnaja2	83.40953266
85260	Entpd6	83.28526683
316325	Hs6st1	83.28335239
498433	Psme4	83.28305509
294228	RT1-S3	83.21919837
171048	Tspan8	83.04900578
689995	Ppp1r3d	83.03662642
116684	Oplah	82.48273237
360848	Shisa4	82.36206289
293497	Kctd13	82.31228615
60628	Cxcr4	82.02867696
306600	Atp11a	81.96689015
314453	Wdr20	81.89965478
678741	Zc3h4	81.8039563
301009	Nckipsd	81.78044484
362374	Vopp1	81.56342965
25084	Il4r	81.47318427
266804	Prl7b1	81.34860495
100910774	LOC100910774	81.31813129
60383	Rbck1	81.23740338
303745	Sirt7	81.17904397
306141	Spry2	81.13447272
64202	Calr	81.0495446
361454	Ccdc28a	81.00560362
29757	Atp6v0a1	80.71807694
361241	Serpinb9	80.64737371
24747	RT1-M3-1	80.44022106
296350	Serinc3	80.25740061
363485	Pbdc1	80.19756707
315697	Imp3	79.96562031
81776	Rps24	79.86428394
294269	RT1-Da	79.79148947
116475	Ift172	79.5785559
81762	Rock1	79.35128742
25114	Fgfr4	79.34133605
316742	Tgif1	79.21907912
361004	Zswim8	78.97433019
312709	Mlf2	78.63248237
29540	Hsd17b7	78.59261006
25431	Dlx5	78.54994439
54702	Egln3	78.54332586
303073	Cyfip2	78.4512411
294962	Gnb4	78.23217473
65204	Cnn1	78.01139292
500623	Wdcp	77.90657284
116670	Ppp1r12a	77.77884805
54245	Crk	77.42060436
81668	Gnrhr	77.36557016
680549	Pknox2	77.36098121
293050	Abhd2	77.01137488
362734	Stxbp6	76.84594331
362657	Mthfr	76.77774493
296709	Rpl35	76.77359033
290907	Lig4	76.74406209
79223	Gk	76.72401492
288480	Aimp2	76.52406928
297748	Jph1	76.2697064
81869	Gstm7	76.21572959
81718	Cdo1	76.19505646
310071	Ercc8	76.1610517
691143	LOC691143	76.02434497
683923	Bend3	75.85359265
679944	Alkbh7	75.79994487
29602	Ptgfrn	75.77686291
24493	Il1a	75.58530181
171116	Opa1	75.58478106
170699	Atp2c1	75.43849717
140724	Cacng3	75.3007386
60334	Ensa	74.93904646
686412	Sall4	74.93696031
287115	Pgp	74.85598761
54350	Scfd1	74.82069744
64846	Slc13a3	74.80159971
171051	Cabp1	74.62060128
298376	Gpx7	74.61610109
245957	Ddx46	74.60560612
60326	Kcnv1	74.54156482
499443	Lims1	74.2946164
58979	Gng7	74.03780402
117029	Ccr5	73.83688688
294964	Ndufb5	73.65822836
361818	Rsph1	73.65391268
361810	Fkbp5	73.54410738
60418	Gde1	73.43147837
54304	Ssbp1	73.36072032
499663	Lce1f	72.90325595
83462	Dynlt1	72.88354224
309525	Slc16a12	72.63486664
64475	P4ha1	72.51631974
170906	Zdhhc7	72.39787899
64037	Slc22a4	72.24491215
301245	Yipf3	72.21654661
84347	Cacng2	72.17094319
290447	Mycbp2	71.89234199
29524	Limk2	71.83367504
306998	Cdk13	71.77077867
362899	Nipal2	71.64147947
289089	Ivns1abp	71.63224452
361624	Akip1	71.57784137
362952	Eif3d	71.50425915
25263	Mal	71.43089625
114122	Vcan	71.40290075
102555797	LOC102555797	71.30191169
24400	Gnb1	71.29508813
361833	Ank3	71.20225334
117241	Pop5	70.80470636
364052	Pea15	70.75465219
287476	Zzef1	70.46734046
310746	Ap4b1	70.4597648
297334	Mrpl35	70.29622217
361805	Uqcc2	70.20615262
293451	Hs3st2	70.20355991
100360017	Mrps6	70.16823641
287739	Eftud2	70.00252603
24387	Gfap	69.79445307
79433	Myh10	69.56021988
114511	Emb	69.22985869
65199	Kcnip3	69.12279595
65166	Sec11a	69.04261382
25238	Grk2	69.02702816
25650	Atp1b1	68.84730932
361151	Ufsp2	68.8090128
308392	Strn4	68.52327097
302705	Mbtps2	68.25757224
66028	Arl6ip5	68.04213326
685882	Syndig1l	67.91347513
289197	Mgst3	67.7922399
252921	Tubg1	67.64541469
171455	Exoc2	67.63320119
102550385	Lyrm4	67.59738784
24249	S100g	67.5169019
497770	Scn3a	67.33377005
313436	Zcchc12	67.32604954
25116	Hsd11b1	67.31618509
291076	Eci3	67.12900624
260416	Carhsp1	67.11123068
79123	Asic1	67.07157748
363972	Dpp10	67.06674503
81521	Msn	67.04492816
64316	Srpx	66.83691751
81707	Mmp14	66.64803738
500040	Tes	66.61835385
64440	Syt4	66.49397886
312754	Ppp2r5a	66.43051334
81749	Prkch	66.31649354
315298	Racgap1	66.30947486
361100	Top2b	66.1964561
361070	Xpo7	66.00039361
289233	Pex19	65.97431282
302642	Sat1	65.97131558
362513	Shb	65.54817294
192234	Eif2b5	65.45864899
293703	Nudt22	65.34106345
291844	Setd6	64.96059592
192213	Rasgrf1	64.92151219
140908	Cdk5	64.90142783
680110	Rprm	64.44071726
81761	Rnpep	64.39111365
29593	Ckmt1	64.19787734
306811	Wnk2	64.18647175
80843	Sec61a1	64.10378385
311661	Zfp64	63.98214697
29179	Syn2	63.902949
364154	Smim14	63.87848682
29711	Bckdhb	63.76741991
361466	Tppp	63.66593587
25264	Nmbr	63.62128785
60414	Rhd	63.49295404
58977	Ppp1r1a	63.46993902
288264	Ifnar1	63.3893319
25614	Ptk2	63.25035616
29131	Cartpt	62.87205056
25757	Cpt1a	62.66871588
83783	Sult1a1	62.63366505
117039	Gps1	62.4991503
114856	Dusp1	62.42416072
293067	Zfand6	62.35210898
25613	Ptprz1	62.27779794
100911719	LOC100911719	62.19930026
25737	Pcna	61.91956491
362366	Fkbp14	61.84552073
64538	Ilkap	61.83613633
25709	Hmbs	61.79328618
84407	Cdh11	61.61357164
25405	Ccng1	61.59222067
295443	Papss1	61.5788134
25306	Cpd	61.56084111
361472	Mthfd1l	61.45665812
170551	Slc5a6	61.23885996
300186	Amigo2	61.03368195
84013	Hsd17b12	60.85827944
171441	Yif1a	60.57316856
171435	Aagab	60.541961
64198	Pmpcb	60.49304624
303188	Rai1	60.18795317
362835	Reep6	59.78118774
298982	Maea	59.73377631
500913	Shisal1	59.64345841
688429	Arhgap10	59.50920026
81800	St13	59.31663503
315059	Trappc9	59.26614612
298782	Ttc27	59.07305061
296162	Ddrgk1	59.00850657
83782	Nme2	58.91813279
29675	Psmb2	58.81943101
685474	Zfp385a	58.78762058
170496	Lcn2	58.71945238
94201	Cdk4	58.71312716
64033	Ccnd2	58.59286795
363074	RGD1309779	58.50074545
303879	Slc51a	58.32787017
294239	Ddah2	57.95698185
680752	Ccdc74a	57.9514468
300664	Abcg4	57.56519271
361064	R3hcc1	57.41338284
299938	Mrpl13	57.34471705
100912357	Ndufb1	57.27592809
365567	Micu1	57.23640331
362886	Rassf3	56.95293271
102549203	LOC102549203	56.83012688
300266	Cbx5	56.82444148
25232	Tyro3	56.74876765
25104	Pc	56.58835614
315728	Thsd4	55.891615
24172	Adh1	55.87330774
288583	Plod3	55.83830572
116549	Csnk2a1	55.79184791
50686	Gsk3a	55.75822806
367172	Dhx30	55.7421863
56777	Adam1a	55.45213747
81515	Lyn	55.36934688
50662	Runx1	55.04325412
304019	Tbc1d23	54.85939379
296380	Arfgef2	54.75054159
54705	Pdp1	54.56811269
58954	Klf6	54.50737621
24666	Ppm1a	54.49590152
291005	Gadd45g	53.96953132
29546	Homer1	53.91567454
497815	Nrcam	53.86845562
117104	Ppp2r2a	53.64804334
24778	Slc2a1	53.48055084
64896	Nolc1	53.46426358
309475	Tm9sf3	53.3894937
29630	Psme1	53.32067145
29636	F2rl2	53.20673633
361111	Smim4	53.17669281
306840	Sirt5	53.1628842
303604	Map3k3	52.9807222
25434	Sparcl1	52.91451782
114505	Klf4	52.67379239
65033	Stx12	52.64309901
689074	Camsap3	52.37910387
65195	Kcnd3	52.23377244
308384	Sae1	51.98169928
292724	Ccdc97	51.91499985
362597	Eva1b	51.667487
289180	Gpr161	51.65103369
689030	Tbpl1	51.46430266
29591	Tgfbr1	51.30098199
171574	Dnm3	51.22945953
25270	Abcd3	51.15568217
25659	Khk	51.13110598
171179	Glyatl2	51.0576494
304944	Uck2	50.95783362
60416	Pfkp	50.82969621
362737	Heatr5a	50.80853387
500707	Tc2n	50.77572269
114764	Mapre1	50.63604096
690853	Aatk	50.57206082
192273	Slc22a25	50.56431284
287435	Cd68	50.04917691
315880	Tbc1d2b	49.86921894
65205	Mmp16	49.77542805
300983	Abhd14b	49.71748052
64369	Plpp1	49.66102982
81803	Stx4	49.57933428
78947	Mogs	49.47352104
290963	Aopep	49.46153754
81809	Tgfb2	49.45216666
116717	Trip10	49.40992374
291877	Nudt21	49.3451092
56646	Lgals1	49.29198812
679028	Rbpj	49.18606413
289178	Dpt	49.1624609
25490	Nedd8	49.12627831
300455	Bmper	48.96246604
293418	Rpl27a	48.94654315
690262	Yaf2	48.57910997
362228	Naa20	48.49824339
24547	Mbp	48.46930401
246143	Nradd	48.46020273
85383	Nol3	48.33831093
24786	Sod1	48.32815352
29748	Ppp3r1	48.26812401
64390	Prpsap1	48.23023042
291539	Psmg2	47.98124283
311254	Pdhx	47.73860312
24504	Inha	47.65256957
24916	Rnf112	47.61968922
362770	Ccdc88c	47.34414015
305025	Tp53bp2	47.27845573
29618	Btg1	47.26456165
362599	Trappc3	47.15185556
24423	Gstm1	47.12679258
500244	Aak1	47.09073695
89787	Lrp3	46.94107561
113922	Selenof	46.86934399
83586	Usf1	46.20318137
297388	Bola3	45.93789819
100362155	Cyhr1	45.77591722
29434	Rasgrp1	45.70045769
303468	Sgca	45.69016523
100912373	LOC100912373	45.32697114
84556	Rims1	45.16092105
367235	Fam135a	45.00535314
171068	Pou2f1	44.99800924
83503	Polr2f	44.97173
54260	Itpkb	44.70622309
116563	Ap2m1	44.65568481
100362733	Irgm2	44.47547854
64537	Hpse	44.40064176
114017	Gfm1	44.15023991
85332	Cavin3	44.11266811
252881	Exoc3	43.73783684
78959	Akr1a1	43.67624839
294930	Nceh1	43.61506667
29525	Pitpna	43.4860489
83533	Aifm1	43.41882586
25492	Nfia	43.29383076
303608	Ftsj3	43.2669975
691375	Serpine3	43.25647181
298861	Ptrhd1	43.22322682
100360120	Smim10l1	43.20406842
170917	Cry2	43.10865561
362344	Ndufb2	43.08356309
313445	Klhl13	42.8766163
291906	Aktip	42.86097254
364974	Rnaseh2a	42.82424558
83577	Itgae	42.71098998
100912151	LOC100912151	42.61278862
245963	Egfl7	42.56898814
60325	Serpinb2	42.47592401
84019	Nae1	42.39584328
64367	Ppib	41.62220378
192183	Nectin1	41.20699768
309167	Pcnx3	41.11433467
315126	RGD1359634	41.02294964
140923	Bnip3l	40.97982041
307907	RGD1304884	40.97432798
83840	Rps6kb1	40.95617434
155151	Coro1a	40.83778604
310588	Tchh	40.70123187
362087	Ubac1	40.5407689
24223	B2m	40.38578325
287302	Mrpl22	40.34359956
25625	Tnfrsf1a	40.29867069
24241	Calca	39.94041866
29458	Neurod1	39.94012314
291463	Ppic	39.84968018
691455	Calml4	39.69209662
29355	Pkn1	39.47708965
361802	Hsd17b8	39.39705787
64200	Hnrnpf	39.38493743
500226	Wdr54	39.30259527
26193	ND1	39.29224932
63840	Per2	39.27246513
312563	Prickle2	39.15935805
301343	Lman2l	39.09934498
25592	Agrn	39.07973577
287524	Rpa1	39.03587993
192251	Gpr149	39.02157995
499768	Tbc1d13	38.94059202
116504	Mprip	38.90871771
29665	P2rx7	38.86273186
85237	Ptp4a2	38.83831089
60398	Fhit	38.68089195
498959	Fbxo31	38.61597891
246172	Nexn	38.57111554
84356	Abcd2	38.49425237
689314	Mapk11	38.31626154
171577	Epcam	38.24539069
171128	Gchfr	38.19769146
85254	Slc44a1	38.15605607
100145871	Adh5	38.14438849
690244	Sumo2	37.90208916
113976	Acsl4	37.8524306
368062	Ankib1	37.70204541
64461	Decr2	37.64536862
295588	Rnd3	37.64006735
288912	Mri1	37.599274
81635	Adar	37.59135278
25466	Il1rap	37.51785571
84384	Timm10b	37.38136929
79115	Evl	37.19763337
304650	Misp3	37.12562437
117035	Slc25a20	37.02266568
311423	Slc4a11	37.02056578
307644	Kifc3	36.97387179
54321	Cnn3	36.7482476
362691	Tmem178a	36.731079
117042	Rpl6	36.50305128
25620	Crem	36.48654798
25338	Ninj1	36.2565379
29143	Grn	36.18376844
100912041	LOC100912041	36.16878332
292130	Afap1l2	35.97560087
84493	Fmo3	35.93998565
116720	Pik3c2g	35.9216836
292876	Josd2	35.8087476
368066	Inmt	35.77600891
170907	Serinc5	35.76118396
24791	Sparc	35.68415999
257646	Frmd6	35.58269257
29502	Slc20a2	35.49362075
24189	Aldoa	35.4704849
192252	Dctpp1	35.2830341
245983	Il11ra1	35.22161824
303786	Aifm3	35.08480098
363004	Prr13	34.56892785
301535	Stk11ip	34.55924612
311807	Bmyc	34.55729488
361190	Usp19	34.25045157
25314	Emp1	34.23343564
303518	Smarce1	34.22844474
295341	Ppm1j	34.11695004
64300	Mthfd1	34.04348324
64226	Mlst8	34.02872444
60660	Ppp2r2b	34.02138876
170819	Il24	34.00527366
24232	C3	33.89559541
81715	Camlg	33.7270117
102554187	LOC102554187	33.65555901
192260	Cdipt	33.60389119
81756	Rab13	33.5974941
171083	Itfg1	33.46978111
308846	Uvrag	33.44809
362824	Mfsd12	33.39196718
690130	Rhof	33.1524661
690333	Sertm1	33.06859539
690349	RGD1597339	32.88298174
25124	Stat1	32.88218082
29613	Ntrk3	32.84292389
681361	Pisd	32.77894538
305792	Kctd6	32.51165993
24214	Atp1b2	32.34495917
117182	Hsd17b3	32.1807742
79462	Txn2	32.0992085
84416	Smpx	32.02216005
313370	Hook1	32.01081508
362169	Alkbh3	31.99518347
24596	Ngfr	31.74300511
294975	Exosc9	31.65482598
308212	Dact2	31.46825359
310960	Usp33	31.45915061
25673	Anxa5	31.45682319
171503	Camk1	31.4217456
299954	Ndufb9	31.4050275
25315	Ephx1	31.37207313
66013	Arhgef9	31.3648829
286988	Pnrc1	31.2320188
641603	Slc41a3	31.22492249
301709	Arhgap28	31.19926424
497778	Dut	31.02256644
192243	Golgb1	30.89807471
25662	Igfbp2	30.8788534
689710	Heg1	30.7374154
29629	Gria4	30.65463109
497757	Gucy1a1	30.4423314
100360936	Anapc16	30.39794427
54133	Pdlim1	30.31045296
25427	Cyp51	30.14683685
29443	Ahcy	29.99627228
192256	Pja2	29.98678296
24417	Grm4	29.92610313
56725	Cript	29.7976468
29279	Meox2	29.7212399
60395	Trpc3	29.69211059
29501	Slc12a4	29.66119304
288743	Sgsm1	29.65843674
316348	Pdcl3	29.44871276
117101	Kcnc3	29.38856209
313375	Cyp2j3	29.30751594
29276	Csrp1	29.18074959
257642	LOC257642	29.07670014
29140	Snn	28.86957172
266766	Rcan1	28.77182272
64635	Snd1	28.61900738
81740	Pcm1	28.58506521
24426	Gstp1	28.56275961
297597	Ing4	28.46471945
84008	Cntnap1	28.35019259
24784	Slc9a3	28.31331838
24681	Prkcg	28.23201716
59101	P3h4	28.17832677
303403	Med13	28.13472583
295923	Ndufs3	28.03813311
305291	Srd5a3	27.99359866
500552	RGD1561149	27.8491951
303792	Klhl22	27.84444617
83509	Slc7a7	27.74417459
56083	Tgm2	27.67409558
79257	Axin1	27.64257394
29256	Oprl1	27.60568495
81675	Gyg1	27.58331777
64845	Gphn	27.53788177
29221	Arg1	27.47882805
50551	Txnrd2	27.11648626
299357	Igh-6	26.98506322
246331	Nrp1	26.55485425
24399	Glud1	26.53052604
360462	Ntan1	26.37668701
361368	Large1	26.36117968
54226	App	26.28163159
301252	Hsp90ab1	26.24089202
498789	RGD1564865	26.2322276
364208	Cnrip1	26.08288783
298201	Fam214b	26.01252311
83579	Gnb5	25.97822807
309014	Plpp4	25.93947958
361630	Tead1	25.7559096
29415	S1pr2	25.72651636
293570	Abraxas2	25.58375815
83472	Ugdh	25.55612007
155183	Skap2	25.54102321
680021	Grhpr	25.4654079
501550	Trappc2	25.41125992
25562	Eloa	25.37251375
369016	Myadm	25.29730076
361092	Stk24	25.25702407
606294	Kifbp	25.02862234
360994	Chac2	25.00943496
83527	Dbnl	24.99284174
58852	Nr1h3	24.99275275
24695	Pthlh	24.9074475
294324	Agpat3	24.79644815
298019	Ctnnal1	24.52001599
64534	Pim3	24.50907281
299521	Camkmt	24.50407817
362255	Vstm2l	24.49454313
293938	Bloc1s2	24.48737454
65168	Scamp2	24.47615537
299827	Tbk1	24.46868548
89809	Rfc1	24.31594191
688393	Gpn1	24.25301645
85238	Synj1	24.24083638
29421	Urod	24.17516413
315305	Atf1	24.11273857
299075	Trappc6b	24.01952782
64001	Cyb5a	24.00315759
100912108	Nupr1	23.92802826
289950	Pdhb	23.85877299
64371	Prdx3	23.70664013
685277	Ildr2	23.69576959
24957	Glul	23.66279152
313020	Wdtc1	23.52576141
287472	Tlcd1	23.4811198
54278	Nr4a2	23.38354365
24330	Egr1	23.36071337
65032	Htr7	23.25986515
317598	Mcf2	23.25316887
24923	Stx1b	23.23573575
29153	Capn1	23.19671753
282636	Impa2	23.19203649
83610	Apba2	23.04922498
29461	Vgf	23.02084842
64539	Ndufv3	22.98730959
156117	Casp12	22.92312777
312309	Zfp775	22.87538382
310399	Naa15	22.78236767
64366	Calu	22.70359664
25703	Rbp4	22.53015937
81824	Arpc1a	22.30420207
500152	Mmrn1	22.23783058
25058	Hk1	22.18191921
685612	Col26a1	22.17853616
314988	Zhx2	21.92435215
303796	Zdhhc8	21.92371839
26954	Rheb	21.88417098
293624	Irf7	21.85200123
301124	Micos13	21.81317664
54400	Bet1l	21.67853874
83628	Cd82	21.66058753
85425	Tdrd7	21.54156058
50672	Ednrb	21.43775663
89805	Angpt2	21.4332897
117280	Hnrnpu	21.39786562
29885	Rab3ip	21.28718202
360715	Boc	21.18416286
64317	Gpx3	21.03743165
297392	Tex261	21.0352705
361672	Kndc1	20.77355976
24482	Igf1	20.70085315
140673	Napa	20.54706392
53982	Zfp260	20.5128332
114634	Six1	20.49761687
25698	Ass1	20.47979149
56010	Ywhag	20.43156493
117089	Bex3	20.36428201
501203	Myl12a	20.36286089
25415	Crmp1	20.19295232
361801	Rxrb	20.1894212
306015	Fam160b2	20.0853678
245926	Scaf8	19.92773779
117062	Hmga1	19.92541326
29464	Slc6a6	19.7992545
295538	Depdc1	19.76931835
294331	Ube2g2	19.63361092
64524	Tkt	19.63048646
497942	Cxcl16	19.57082737
294231	RGD1302996	19.29246022
83619	Nfe2l2	19.28154891
289034	Tmem183a	19.2646015
24307	Cyp4b1	19.24300031
288176	Cmss1	19.21342346
64195	Clec10a	19.18692318
305886	Slc22a17	19.15190729
361351	Hdhd2	19.06996518
689938	Ndufc1	19.00997202
29192	Psen1	18.99495738
83624	Ppig	18.99334109
286928	Abi2	18.96029382
58827	Mest	18.93134686
316794	Brcc3	18.91780991
317232	Magee1	18.88263767
685607	Pfdn2	18.79911172
171045	Mmp3	18.78078976
24173	Adra1b	18.57663312
59295	Nucb2	18.38066201
83471	Prep	18.33053476
364678	Sfxn1	18.32187211
297594	Cdca3	18.27519104
290644	Ifi30	18.09778158
64514	Eif2b1	17.74823839
83842	Crot	17.6002805
27064	Ankrd1	17.58938027
56266	Cyp4f1	17.57766145
83588	Kcns3	17.54429305
29528	Vamp3	17.54053793
25193	Ccnd3	17.45906298
29414	Akt3	17.4181231
295161	Fhdc1	17.38842011
50557	Pten	17.34550825
303164	Zfp692	17.33625802
286917	Phax	17.26469284
116673	Sdc3	17.1886483
116561	Cltb	16.90223942
306071	Lcp1	16.84602678
116655	Hnrnpm	16.7302537
25511	Pemt	16.72755786
294810	Tars1	16.69323048
117269	Rps6ka2	16.62180315
65052	Pik3c3	16.58483605
79428	Luzp1	16.48537887
307343	Fam210a	16.41841192
50871	Hpcal1	16.4083044
29704	Pacsin1	16.39328953
362401	Tmem43	16.38189909
361598	Iqgap1	16.3758788
24553	Met	16.3511038
79208	Epha5	16.24288183
117103	Rab8a	16.11292882
117060	Ubr5	16.08090227
25697	Ctsl	16.0536123
114766	Phb2	16.05136993
94340	Acsl5	16.01074755
501625	Bex1	16.00632257
362058	Miga1	15.98892183
290556	Gnl3	15.93762235
24699	Ptprc	15.91543348
50719	Slc7a5	15.88538804
89783	Laptm5	15.77370442
316213	Frs3	15.67532163
81750	Pros1	15.6554081
117955	Slc4a7	15.61230759
113902	Ces1d	15.56578485
312502	Rab11fip5	15.49352645
317646	Rpl13a	15.45361787
368070	Pnn	15.32261696
499073	Brsk1	15.1742012
54319	Ezr	14.97958387
307348	Spire1	14.94444266
24404	Gpx1	14.91082435
171434	Phldb1	14.88485422
295143	Etfdh	14.86866753
171155	Hadhb	14.80470401
100360015	Car10	14.80437267
60377	Lin7b	14.80003392
114839	Ccnc	14.79698541
300981	Acy1	14.74191174
25113	Ddn	14.68778107
287910	Ccl6	14.58112754
286894	Parm1	14.58110086
114124	Akap1	14.54478662
25670	Il15	14.49894152
81523	Myoc	14.39934951
311952	Galnt11	14.20138762
25444	Fgf9	14.18792421
365396	Ssh3	14.06532679
246074	Scd	14.01910522
690345	Srp9	13.99466391
289143	Mrps14	13.87168049
58952	Cpq	13.75043017
299825	Gns	13.60835606
114023	Copb1	13.60584529
140693	Plcd4	13.59963325
691842	Maz	13.55159195
24805	Syt2	13.54227111
117051	Arfrp1	13.53256735
363256	Speg	13.47943487
299706	Nup37	13.29210701
315327	Spryd3	13.2641038
364823	Klhl14	13.23962706
406864	Clic1	13.20936676
116635	Scg3	13.18511097
58845	Igbp1	13.17621698
29422	Chrne	13.12117989
64203	Bcat2	13.04355594
363453	Ppp1r3f	13.02212622
25379	Anp32a	13.02032362
362325	Mdfic	13.00911729
296219	Nxt1	13.00613636
79119	Arf2	12.98797893
25619	Plau	12.93101203
117855	Sf1	12.81896768
295310	Zfp697	12.79576661
84386	Slpi	12.71585258
64360	Mrpl23	12.64858507
295224	mrpl24	12.57804471
24438	H1f6	12.56017962
50554	Smad4	12.48960145
362988	Cpne8	12.37299269
29254	Mgll	12.33925706
65028	Dnaja1	12.33919095
25423	Ctsc	12.33169934
367304	Ap1s3	12.1780311
296318	Ndrg3	12.16518898
25045	Dbi	12.0617997
24679	Prkar2b	12.04716955
83575	Cpz	11.96667782
63887	Nmu	11.86174949
366277	Polr3k	11.79883134
25739	Pygb	11.77700036
311844	Kyat1	11.76899032
116600	Cacnb2	11.71384799
83611	Apba3	11.70357465
63836	Actn4	11.70046456
94339	Mmp23	11.55947299
304859	Dhx9	11.51235014
24710	Rbp2	11.49468925
360697	Ifngr2	11.45760945
29619	Btg2	11.43484282
192270	Plpp3	11.33062636
368001	Bcl7b	11.31787809
29476	Glg1	11.31356293
100911360	LOC100911360	11.26676492
306792	S1pr3	11.20631867
64473	Bpnt1	11.18260953
64523	Tep1	11.09497567
83810	Trpv1	11.09137027
360980	Tns3	11.06258729
25424	Ctse	11.04544547
25661	Fn1	11.01936221
289181	Dcaf6	11.00493809
78968	Srebf1	10.97384202
65153	Ncs1	10.96105386
113918	Slc6a20	10.90614675
500793	Btbd2	10.80910337
365793	Rab33b	10.78685062
79430	Clcnkb	10.7837955
362227	Dtd1	10.766443
498549	Akap11	10.74921059
29194	Chka	10.70620531
24483	Igf2	10.70418664
64679	Tgm4	10.67270759
25676	Rasa1	10.66991315
54237	Cdk1	10.60940218
171114	Ndrg2	10.59211413
24770	Ccl2	10.51778219
140914	Olr1	10.45335132
78956	Scn9a	10.34731781
309816	Lama4	10.31628772
499745	Nrarp	10.27620308
79431	Bhlhe40	10.21999275
290642	Ccdc124	10.13002538
58919	Ccnd1	10.12780083
306030	Med4	10.12023752
100360623	Iqgap2	10.10104268
362440	Ndufa9	9.809133549
362377	Herc3	9.776737818
24299	Cyp2a3	9.760329921
171335	Cox8a	9.689679731
690308	Tsen54	9.524986546
296758	Armc10	9.480483951
83505	St3gal5	9.475249397
314743	Cdk17	9.406121052
64529	Ctsb	9.347849833
65043	Rpl14	9.340850237
29533	Pxmp2	9.330951258
305544	Aftph	9.288575863
301415	Ankrd44	9.243515669
294235	Ier3	9.229856117
360702	Ttc3	9.160987118
100910940	Evi2b	9.082953219
306722	Dapk1	8.994759019
25323	Htr1d	8.986472139
25029	Calcrl	8.924333096
29218	Rcn2	8.907930368
311193	Arhgap1	8.788106157
24356	Ets1	8.774310794
81664	Gnai2	8.766092529
116483	Dars1	8.736698374
54289	Rgs1	8.662935284
94270	Nnat	8.654923078
688785	Trim8	8.491699985
266711	Lzts1	8.482644186
59074	Stx8	8.472176234
29398	Stk10	8.462278886
246314	Tor1aip1	8.456416243
171485	Cd99l2	8.455572858
25742	S100b	8.451544413
81667	Gnb2	8.43841048
171296	Myo9a	8.337562872
171522	Cyp2d4	8.325371645
25130	Stx2	8.190973662
25022	Fgfr2	8.179587071
308069	Slc12a7	8.107313034
170520	Cygb	8.102774931
25026	Adm	8.085170032
64347	Sncg	8.031079734
50663	Calm2	8.003450047
24407	Grik5	7.972138108
289874	Erlec1	7.944315522
362631	Rpl11	7.928017482
259247	Obp3	7.921560355
364224	Acyp2	7.879093447
81636	Adcy2	7.824433204
25510	Pcp4	7.782734105
680770	Skida1	7.748140159
287656	Mrpl45	7.715563408
313052	Epb41	7.643078052
100363145	Stab1	7.613818195
296635	Plpp7	7.60164691
300441	Tmem205	7.553315996
25441	Fcer1g	7.346567991
116644	Rtn1	7.319789182
81751	Psen2	7.26546596
117020	Mcf2l	7.240062152
292892	Irf3	7.238954245
29230	Sqle	7.236853256
54302	Slc14a2	7.213102323
116633	Akap8	7.170575516
24781	Slc4a3	7.132024524
24684	Prlr	7.033237312
140607	Pip4k2c	7.009374479
296706	Lhx2	7.007888992
83526	Atrn	6.977828842
116643	Vcp	6.888391234
64517	Thop1	6.821136845
25702	Pnlip	6.678549478
50654	Ctss	6.657356579
298762	Cox7a2l	6.564316728
80881	Serp1	6.368211162
641434	Atp5pd	6.357800932
683667	Sri	6.316047615
363216	Cnnm4	6.262171209
295922	Mtch2	6.179158942
501052	Tusc2	6.121149728
362019	Elapor1	6.028050526
58844	Grb14	5.980525726
317413	Morf4l2	5.961346463
313648	Ddost	5.946006895
303666	Cd300c2	5.934715336
81785	Ssrp1	5.901793133
246211	Hsd3b7	5.891212138
294236	Gtf2h4	5.862166929
361094	Ubac2	5.816929816
500987	H2ax	5.812724418
81684	Mipep	5.807222574
81507	Bmpr1a	5.759608461
296588	Pmpca	5.759094095
362861	Slc41a2	5.753348879
688502	Prmt8	5.743083436
81505	Emp3	5.637033424
56769	Ndufaf3	5.627336358
682914	Zfp326	5.572999724
24674	Ppp3ca	5.480230096
171516	Akr1c3	5.473966583
246772	Vps4a	5.459737905
64301	Smn1	5.375055416
65030	Ephx2	5.358764763
65081	Vps33a	5.337930677
171444	Pacs1	5.299717947
306270	Oxnad1	5.247228215
24536	Lepr	5.22262274
79212	Slc6a1	5.165520791
29424	Htt	5.105589688
301517	Cyp27a1	5.052455394
296156	Cpxm1	5.045133237
298689	Ube2j2	4.997644824
293017	Bclaf1	4.923121374
360592	Trim37	4.876404419
29177	Hpca	4.832824207
293154	Folr2	4.819812721
25538	Rps5	4.775035085
363278	Atg16l1	4.770709051
81807	Elob	4.720873591
59085	Asl	4.714509179
29753	Ywhae	4.664992967
25651	Selp	4.644300039
116565	Lrpap1	4.590210205
117258	Cntn1	4.589752061
102554398	LOC102554398	4.544924544
689593	Dnajb2	4.514493699
299153	Ppp1r36	4.513166886
24787	Sod2	4.469317939
502603	Srsf11	4.422484086
83803	Prkab1	4.405093101
84409	Robo2	4.328364286
171162	Reg3a	4.3108225
29597	P2ry2	4.260961534
102547720	LOC102547720	4.256897481
246295	Cep104	4.21538607
29383	Fah	4.156763659
311607	Chd6	4.144888289
24477	Ibsp	4.129736516
363212	Bend6	4.124806079
313529	Tmem53	4.106269485
64681	Mvp	4.096197837
64526	Ech1	4.094479027
114119	Gng10	4.067255427
685045	Abracl	4.056803744
54259	Inpp5d	4.051659089
79247	Htr5b	4.0490825
25520	Prkag1	4.038083119
298199	Plin2	4.009211335
24678	Pkib	3.99719563
294744	Gpx8	3.996180623
60581	Acaca	3.953001674
299201	Dlst	3.932127301
94204	Ece1	3.906585695
83727	Fbn1	3.862142103
81739	P2rx3	3.848837393
303300	Cluh	3.744193644
114597	Suclg1	3.661122639
246324	Rab31	3.590763398
308669	Herc2	3.587505019
316842	Metrnl	3.536705555
25681	Col10a1	3.50125525
29599	Atp2b3	3.48281754
192349	Caly	3.47651499
306805	Aspn	3.43820756
363640	Olr1493	3.423820288
315798	Zfp280d	3.303632133
29674	Psma7	3.265508606
24620	Reg3g	3.26229552
102546572	LOC102546572	3.259002423
282819	Ppif	3.202270431
81660	Gatm	3.201969429
81812	Thra	3.194267055
140940	Arf3	3.154611881
24513	Ivd	3.135983385
79239	Hmox2	3.105228971
29151	Ucn	3.09564614
29740	Eci1	3.056996983
114590	Ubqln1	3.009314572
65152	Pfkm	2.922222169
311287	Ano3	2.909648751
84005	Eif2b2	2.854472915
296883	Rpa3	2.801597323
24588	Nefm	2.787585204
59102	Rpa2	2.780494064
363142	Sema3b	2.773867887
291813	Cmtm3	2.749922387
83584	Casp6	2.741474516
316091	Pomgnt2	2.716601753
498753	Hist1h2af	2.700681928
312113	Stard8	2.637688206
297627	Rhno1	2.633359241
288161	B3galt5	2.604874186
25550	Slc1a1	2.583293934
24765	Scg2	2.550591138
54238	Cdkn2c	2.53571775
288913	LOC288913	2.501871247
89817	Sh2b1	2.490793934
56759	Rnase4	2.446886735
65045	Ppp1r10	2.421928506
117140	Hivep1	2.419425463
25054	Ntrk2	2.412780295
114846	Gsto1	2.378258777
81008	Itga7	2.372519148
310659	Rfx5	2.327751022
64513	Pawr	2.310773693
65179	Ppp5c	2.246936869
291541	Cidea	2.240441804
25364	Asic2	2.229726012
25125	Stat3	2.224802328
79122	Fdxr	2.209224945
117520	Oxr1	2.201330274
116666	Lman1	2.201193004
25211	Lyz2	2.17157267
117243	Acsl6	2.171482198
25493	Nfkbia	2.092116222
24338	Ephb1	2.059621476
363283	Cops8	2.045222589
24795	Serpina3n	2.017932123
[truncated: 190 more rows]
