# Supplementary material for: Analysis of Potential Hub Genes for Neuropathic Pain Based on Differential Expression in Rat Models
Source: Pain Res Manag. 2022 Mar 3;2022:6571987. doi: 10.1155/2022/6571987 (PMC8913144; doi:10.1155/2022/6571987)
Supplement: Supplementary Materials — Supplementary Figure 1. PPI network of DEGs from RRA analysis. DEGs, differentially expressed genes; PPI, protein-protein interaction; RRA, robust rank aggregation. Supplementary Figure 2. GSEA of candidate hub genes in the GEO dataset. (A) C, (E) and (G) GSEA of the single candidate hub genes in GO terms. (A) VOM2R75, (C) TJP, (E) FOXP1, (G) EXT1, and(B, (D) F, and (H) GSEA of the single candidate hub genes in KEGG pathways. (B) VOM2R75, (D) TJP, (F) FOXP1, and (H) EXT1. GEO, Gene Expression Omnibus; GO, Gene Ontology; GSEA, gene set enrichment analysis. Supplementary 1. Upregulated and downregulated genes obtained by RRA analysis. Supplementary 2. Top 50 genes with the highest connectivity. Supplementary 3. Enrichment of DEGs in the turquoise module in GO and KEGG pathways. Supplementary 4.Heatmap of the top 20 upregulated and downregulated genes identified by RRA analysis. Supplementary 5. Repeated measure ANOVA followed by Tukey's multiple comparison test was used to evaluate the paw withdrawal threshold (PWT) between the Sham and SNI groups in Figure 8(a) and Table 2. Supplementary 6.Expression of the five hub genes in the Sham and SNI groups measured using RT-qPCR in Figure 8(b) and Table 3. [file 6571987.f1.zip › 6571987.f1/Supplementary 3.txt]

ID	Description	GeneRatio	BgRatio	pvalue	p.adjust	qvalue	geneID	Count
rno04714	Thermogenesis	57/1102	247/9430	2.46E-07	5.19E-05	3.03E-05	Nppa/Cox4i1/Atp5pd/Mapk14/Cpt1a/Prkag1/Mlst8/Adcy2/Mtor/Tsc2/Rps6kb1/Acsl6/Ndufaf3/Grb2/Ndufv3/Prkaa1/Atf2/Cnr1/Cox17/Atp5po/Atp5f1d/Atp5f1e/Atp5f1a/Mgll/Cox6a1/Atp5f1c/Ndufv2/Cox7a2l/Atp5mf/Cox14/Ndufb9/Ndufs7/Nras/Smarce1/Cox10/Cox20/Rps6ka2/Rheb/ND1/Cox5b/Acsl5/Cpt2/Prkab1/Acsl4/Adcy3/Cox8a/CYTB/Ndufb5/Ndufa9/Ndufs8/Ndufs3/Ndufa3/Rptor/Ndufb2/Ndufc1/Slc25a20/Mapk11	57
rno04919	Thyroid hormone signaling pathway	35/1102	125/9430	4.76E-07	5.19E-05	3.03E-05	Thra/Map2k1/Atp1b1/Pfkm/Plcd1/Mtor/Tsc2/Myc/Stat1/Plce1/Prkcg/Atp1b2/Pdpk1/Pik3r2/Slc2a1/Hdac2/Plcb1/Ccnd1/Notch1/Med27/Nras/Pfkp/Kat2b/Rheb/Med4/Tbc1d4/Thrb/Med13/Mdm2/Med13l/Plcd4/Bmp4/Akt3/Rcan1/Rxrb	35
rno05418	Fluid shear stress and atherosclerosis	41/1102	158/9430	4.85E-07	5.19E-05	3.03E-05	Sumo2/Mgst1/Mapk14/Tnfrsf1a/Gsta1/Nfe2l2/Kdr/Ccl2/Dusp1/Il1a/Bmpr1a/Prkaa1/Jun/Pik3r2/Prkcz/Ctsl/Calm2/Pdgfa/Ass1/Gstt3/Gsta4/Mgst2/Calml4/Hsp90ab1/Acvr1/Acvr2a/Map2k5/Gstm1/Gstm7/Gpc1/Bmp4/Akt3/Map2k6/Ptk2/Gstp1/Mgst3/Hsp90b1/Gsto1/Il1b/Mapk11/Txn2	41
rno05163	Human cytomegalovirus infection	57/1102	259/9430	1.28E-06	0.000102843	6.00E-05	B2m/Mapk14/Tnfrsf1a/Gnb1/Map2k1/Gnai2/Ccl2/Adcy2/Mtor/Tsc2/Bak1/Rps6kb1/Ppp3ca/Myc/Grb2/Ptgs2/Rock1/Gng7/Prkcg/Ppp3r1/Il6/Ccr5/Atf2/Ccr3/Crk/Cdk4/Cxcr4/Pik3r2/Stat3/Calm2/RT1-CE16/Gnb2/Plcb1/Gnb4/RT1-S3/Ccnd1/Irf3/Pxn/Nras/Calml4/Rheb/Tbk1/Gng13/Gnb5/Mdm2/Adcy3/RT1-M3-1/Akt3/Map2k6/Ptk2/Gng10/Cdkn1a/Nfkbia/Il1b/Mapk11/Calr/Pdia3	57
rno04151	PI3K-Akt signaling pathway	72/1102	357/9430	1.77E-06	0.000113699	6.64E-05	Igf2/Ywhah/Gnb1/Map2k1/F2r/Kdr/Mlst8/Mtor/Tsc2/Rps6kb1/Il4r/Ngfr/Myc/Grb2/Ibsp/Vegfc/Bdnf/Pgf/Gng7/Ntrk2/Prkaa1/Il6/Met/Ppp2r2a/Atf2/Prlr/Ccnd3/Cdk4/Lpar1/Pdpk1/Pik3r2/Fgf18/Pten/Fn1/Igf1/Pdgfa/Fgfr2/Fgf9/Ccnd2/Gnb2/Itga7/Gnb4/Ccnd1/Itga6/Nras/Tnc/Angpt2/Gys1/Hsp90ab1/Rheb/Ifnar1/Gng13/Gnb5/Mdm2/Ywhag/Pkn1/Eif4e/Comp/Akt3/Hgf/Ywhaz/Ppp2r2b/Ptk2/Hsp90b1/Gng10/Rptor/Cdkn1a/Lama4/Fgfr4/Myb/Ppp2r5a/Y…	72
rno04723	Retrograde endocannabinoid signaling	39/1102	156/9430	2.51E-06	0.000134405	7.85E-05	Mapk14/Gnb1/Gnai2/Adcy2/Ptgs2/Kcnj5/Ndufv3/Gng7/Prkcg/Rims1/Gabre/Gria4/Cnr1/Kcnj3/Mgll/Gnb2/Plcb1/Ndufv2/Gabra5/Gnb4/Ndufb9/Ndufs7/ND1/Gng13/Gabra1/Gnb5/Adcy3/Gabrg1/Ndufb5/Ndufa9/Ndufs8/Ndufs3/Gng10/Ndufa3/Ndufb2/Gabrg2/Ndufc1/Grm5/Mapk11	39
rno05022	Pathways of neurodegeneration - multiple diseases	92/1102	498/9430	3.61E-06	0.000165419	9.66E-05	Vcp/Uba1/Gpx1/Cox4i1/Atp5pd/Sod1/Hsd17b10/Mapk14/Tnfrsf1a/Map2k1/Sptbn2/Nefm/Dctn1/Mtor/Bak1/Cdk5/Mapt/Ppp3ca/Ptgs2/Ndufv3/Il1a/Bdnf/Psen1/Prkcg/Ppp3r1/Trpc3/Il6/Gria4/Pik3c3/Atxn3/Gpx3/Rab8a/Psen2/Calm2/Atp5po/Atp5f1d/Atp5f1e/Tubb5/Ppif/Atp5f1a/Htt/Cox6a1/Atp5f1c/Plcb1/Ndufv2/Cox7a2l/App/Ndufb9/Ube2j2/Ube2g2/Psma7/Ndufs7/Nras/Gpx7/Gpx8/Klc4/Ppid/Klc2/Psmd11/Calml4/Csnk2a1/ND1/Tbk1/Hip1/Cox5b/Psm…	92
rno04010	MAPK signaling pathway	61/1102	304/9430	1.30E-05	0.00043786	0.00025558	Igf2/Mapk14/Tnfrsf1a/Map2k1/Tgfb3/Kdr/Mapt/Dusp1/Ngfr/Ppp3ca/Myc/Ptprr/Grb2/Ptpn5/Vegfc/Il1a/Bdnf/Cacng2/Ppm1a/Pgf/Gadd45a/Ntrk2/Prkcg/Rasgrp1/Ppp3r1/Met/Map3k8/Atf2/Tgfbr1/Jun/Crk/Rasa1/Fgf18/Cacnb2/Igf1/Pdgfa/Fgfr2/Fgf9/Cacng3/Hspa1b/Rasgrf1/Nras/Map4k4/Angpt2/Rps6ka2/Mecom/Map3k3/Dusp7/Map2k5/Tgfb2/Mras/Il1rap/Pla2g4a/Akt3/Hgf/Map2k6/Gadd45g/Fgfr4/Ppp5c/Il1b/Mapk11	61
rno05220	Chronic myeloid leukemia	24/1102	82/9430	1.31E-05	0.00043786	0.00025558	Map2k1/Tgfb3/Smad4/Bak1/Myc/Grb2/Runx1/Gadd45a/Tgfbr1/Crk/Cdk4/Pik3r2/Hdac2/Ccnd1/Nras/Mecom/Mdm2/Shc2/Ctbp2/Tgfb2/Akt3/Cdkn1a/Gadd45g/Nfkbia	24
rno00480	Glutathione metabolism	23/1102	77/9430	1.36E-05	0.00043786	0.00025558	Gpx1/Mgst1/Gsta1/G6pd/Oplah/Hpgds/Gpx3/Idh1/Odc1/Gclc/Gstt3/Gpx7/Gpx8/Gsta4/Mgst2/Gstm1/Gstm7/Ggt5/Gstp1/Mgst3/Chac2/Gsto1/Gstk1	23
rno05230	Central carbon metabolism in cancer	21/1102	70/9430	2.98E-05	0.000797417	0.000465454	Map2k1/G6pd/Pfkm/Mtor/Myc/Ntrk3/Slc16a3/Hk2/Met/Idh1/Pik3r2/Pten/Fgfr2/Slc2a1/Pdhb/Nras/Pfkp/Hk1/Slc7a5/Gck/Akt3	21
rno04072	Phospholipase D signaling pathway	36/1102	154/9430	2.98E-05	0.000797417	0.000465454	Map2k1/Ralgds/F2r/Adcy2/Mtor/Tsc2/Grb2/Rala/Grm4/Arf2/Ptgfr/Avpr1b/Grm8/Cyth1/Plpp1/Lpar1/Pik3r2/Pdgfa/Dnm3/Plpp3/Plcb1/Nras/Agpat3/Pip5k1c/Fcer1g/Rheb/Shc2/Adcy3/Dgka/Mras/Pla2g4a/Akt3/Fcer1a/Grm3/Plpp2/Grm5	36
rno04910	Insulin signaling pathway	34/1102	143/9430	3.40E-05	0.000838561	0.00048947	Flot2/Map2k1/Prkag1/Mtor/Tsc2/Rps6kb1/Grb2/Hk2/Prkaa1/Crk/Pdpk1/Pik3r2/Prkcz/Calm2/Acaca/Prkar2a/Srebf1/Prkar2b/Prkci/Pygb/Nras/Ppp1r3d/Ppp1r3f/Gys1/Calml4/Rheb/Shc2/Hk1/Prkab1/Trip10/Eif4e/Gck/Akt3/Rptor	34
rno05225	Hepatocellular carcinoma	41/1102	186/9430	3.77E-05	0.000863569	0.000504067	Igf2/Mgst1/Map2k1/Gsta1/Nfe2l2/Tgfb3/Smad4/Mtor/Bak1/Rps6kb1/Smad2/Myc/Txnrd2/Grb2/Gadd45a/Prkcg/Met/Tgfbr1/Cdk4/Pik3r2/Pten/Ccnd1/Gstt3/Nras/Gsta4/Mgst2/Smarce1/Txnrd3/Shc2/Gstm1/Gstm7/Axin1/Tgfb2/Akt3/Hgf/Gstp1/Mgst3/Cdkn1a/Gadd45g/Gsto1/Fzd2	41
rno04218	Cellular senescence	42/1102	194/9430	4.75E-05	0.001010908	0.000590069	Mapk14/Map2k1/Cdk1/Tgfb3/Mtor/Tsc2/Smad2/Ppp3ca/Myc/Il1a/Ets1/Gadd45a/Ppp3r1/Il6/Tgfbr1/Ccnd3/Cdk4/Pik3r2/Pten/Calm2/Ccnb1/RT1-CE16/Ccnd2/RT1-S3/Ccnd1/Nras/Ppid/Zfp36l2/Traf3ip2/Calml4/Rheb/Mdm2/Capn1/Tgfb2/RT1-M3-1/Mras/Akt3/Map2k6/Capn2/Cdkn1a/Gadd45g/Mapk11	42
rno05167	Kaposi sarcoma-associated herpesvirus infection	47/1102	226/9430	5.04E-05	0.001010908	0.000590069	Mapk14/Tnfrsf1a/Gnb1/Map2k1/C3/Mtor/Bak1/Ppp3ca/Myc/Ptgs2/Lyn/Cxcl2/Stat1/Gng7/Ppp3r1/Il6/Ccr5/Pik3c3/Jun/Ccr3/Cdk4/Pik3r2/Stat3/Calm2/RT1-CE16/Gnb2/Gnb4/RT1-S3/Ccnd1/Irf3/Nras/Angpt2/Calml4/Ifnar1/Tbk1/Gng13/Gnb5/Irf7/RT1-M3-1/Akt3/Map2k6/Gng10/Cdkn1a/Rcan1/Nfkbia/Mapk11/Uba52	47
rno04933	AGE-RAGE signaling pathway in diabetic complications	27/1102	106/9430	6.07E-05	0.001146906	0.000669452	Mapk14/Tgfb3/Smad4/Plcd1/Ccl2/Smad2/Egr1/Vegfc/Il1a/Stat1/Plce1/Il6/Tgfbr1/Jun/Cdk4/Pik3r2/Prkcz/Stat3/Fn1/Plcb1/Ccnd1/Nras/Plcd4/Tgfb2/Akt3/Il1b/Mapk11	27
rno04014	Ras signaling pathway	49/1102	243/9430	8.00E-05	0.00142685	0.000832856	Igf2/Gnb1/Map2k1/Ralgds/Kdr/Ngfr/Ralbp1/Exoc2/Grb2/Rala/Vegfc/Bdnf/Ets1/Pgf/Gng7/Ntrk2/Plce1/Prkcg/Htr7/Rasgrp1/Met/Rasa1/Pik3r2/Fgf18/Plaat3/Calm2/Igf1/Pla2g6/Pdgfa/Fgfr2/Fgf9/Gnb2/Rasgrf1/Gnb4/Nras/Angpt2/Calml4/Tbk1/Gng13/Gnb5/Shc2/Pla2g3/Mras/Pla2g4a/Akt3/Rab5a/Hgf/Gng10/Fgfr4	49
rno04146	Peroxisome	24/1102	91/9430	8.50E-05	0.001435464	0.000837884	Sod1/Hsd17b4/Pxmp2/Abcd3/Acsl6/Mvk/Crot/Abcd2/Ephx2/Idh1/Xdh/Agps/Sod2/Scp2/Decr2/Hacl1/Pex5/Pex19/Ech1/Acsl5/Acsl4/Eci3/Hao1/Gstk1	24
rno04921	Oxytocin signaling pathway	36/1102	162/9430	9.24E-05	0.001482593	0.000865393	Nppa/Map2k1/Gnai2/Camk1/Prkag1/Adcy2/Rgs2/Gucy1a1/Ppp3ca/Ptgs2/Kcnj5/Cacng2/Rock1/Cd38/Prkcg/Prkaa1/Ppp3r1/Kcnj3/Jun/Cacnb2/Calm2/Cacng3/Plcb1/Ccnd1/Nras/Calml4/Ppp1r12a/Mylk3/Prkab1/Map2k5/Adcy3/Pla2g4a/Myl9/Cdkn1a/Rcan1/Ryr3	36
rno05214	Glioma	21/1102	76/9430	0.000112954	0.001726579	0.001007808	Map2k1/Camk1/Mtor/Bak1/Grb2/Gadd45a/Prkcg/Cdk4/Pik3r2/Pten/Calm2/Igf1/Pdgfa/Ccnd1/Nras/Calml4/Mdm2/Shc2/Akt3/Cdkn1a/Gadd45g	21
rno00982	Drug metabolism - cytochrome P450	21/1102	77/9430	0.000138509	0.002020973	0.001179646	Mgst1/Gsta1/Adh1/Fmo3/Hpgds/Ugt2a1/Ugt2b7/Ugt2b17/Adh5/Gstt3/Gsta4/Mgst2/Fmo2/Fmo5/Gstm1/Gstm7/Fmo1/Gstp1/Mgst3/Gsto1/Gstk1	21
rno05212	Pancreatic cancer	21/1102	78/9430	0.000169041	0.002359226	0.001377085	Map2k1/Ralgds/Tgfb3/Smad4/Mtor/Bak1/Rps6kb1/Smad2/Ralbp1/Rala/Stat1/Gadd45a/Tgfbr1/Cdk4/Pik3r2/Stat3/Ccnd1/Tgfb2/Akt3/Cdkn1a/Gadd45g	21
rno05205	Proteoglycans in cancer	43/1102	213/9430	0.000209228	0.002798423	0.001633446	Igf2/Mapk14/Map2k1/Kdr/Ptpn6/Mtor/Rps6kb1/Smad2/Myc/Grb2/Gpc3/Hpse/Rock1/Msn/Plce1/Prkcg/Met/Pdpk1/Pik3r2/Cttn/Stat3/Fn1/Ctsl/Igf1/Ank3/Ezr/Ccnd1/Pxn/Nras/Ppp1r12a/Mdm2/Gpc1/Tgfb2/Plaur/Mras/Akt3/Plau/Hgf/Ptk2/Cdkn1a/Iqgap1/Fzd2/Mapk11	43
rno00190	Oxidative phosphorylation	32/1102	144/9430	0.000222367	0.002855196	0.001666584	Cox4i1/Atp5pd/Ndufv3/Cox17/Atp5po/Atp5f1d/Atp5f1e/Atp5f1a/Cox6a1/Atp5f1c/Ndufv2/Cox7a2l/Atp5mf/Atp6v1e1/Ndufb9/Ndufs7/Lhpp/Cox10/ND1/Cox5b/Atp6v0a1/Cox8a/CYTB/Ndufb5/Ndufa9/Atp6v1d/Ndufs8/Ndufs3/Ndufa3/Ndufb2/Ndufc1/Atp6v1f	32
rno05210	Colorectal cancer	23/1102	91/9430	0.000236355	0.002918076	0.001703287	Map2k1/Ralgds/Tgfb3/Smad4/Mtor/Bak1/Rps6kb1/Smad2/Myc/Grb2/Rala/Gadd45a/Tgfbr1/Jun/Pik3r2/Ccnd1/Nras/Msh6/Axin1/Tgfb2/Akt3/Cdkn1a/Gadd45g	23
rno04070	Phosphatidylinositol signaling system	24/1102	97/9430	0.000247394	0.002941234	0.001716805	Plcd1/Cds1/Plce1/Pi4kb/Pik3c2g/Prkcg/Pik3c3/Pip4k2c/Synj1/Pik3r2/Pten/Calm2/Pi4ka/Plcb1/Pip5k1c/Calml4/Itpkb/Ocrl/Plcd4/Dgka/Inpp5d/Cdipt/Ip6k1/Impa2	24
rno04110	Cell cycle	29/1102	127/9430	0.000264994	0.002978153	0.001738355	Pcna/Ywhah/Cdk1/Tgfb3/Smad4/Smad2/Myc/Gadd45a/Ccnd3/Cdk4/Cdkn2c/Ccnb1/Wee1/Ccnd2/Hdac2/Ccnd1/Anapc4/Mcm5/Mdm2/Ywhag/Smc1a/Smc3/Tgfb2/Ywhaz/Anapc5/Cdkn1a/Gadd45g/Anapc2/Ywhae	29
rno01212	Fatty acid metabolism	18/1102	64/9430	0.000269054	0.002978153	0.001738355	Hsd17b4/Hadhb/Acadm/Cpt1a/Acadvl/Hsd17b12/Acsl6/Hadha/Ppt1/Scp2/Scd/Acaca/Hsd17b8/Acaa2/Acsl5/Cpt2/Acsl4/Oxsm	18
rno04062	Chemokine signaling pathway	38/1102	185/9430	0.000334316	0.003577176	0.002088006	Gnb1/Map2k1/Gnai2/Ccl2/Adcy2/Pard3/Grb2/Lyn/Cxcl2/Stat1/Rock1/Gng7/Ccr5/Ccr3/Crk/Cxcr4/Pik3r2/Prkcz/Stat3/Gnb2/Plcb1/Gnb4/Pxn/Nras/Cxcl16/Gng13/Cxcl11/Gnb5/Shc2/Gsk3a/Adcy3/Grk2/Akt3/Ptk2/Cxcl10/Gng10/Ccl6/Nfkbia	38
rno00071	Fatty acid degradation	15/1102	50/9430	0.000401462	0.004157072	0.002426492	Eci1/Hadhb/Acadm/Cpt1a/Acadvl/Adh1/Acsl6/Aldh3a2/Hadha/Adh5/Acaa2/Acsl5/Cpt2/Acsl4/Eci3	15
rno04152	AMPK signaling pathway	29/1102	131/9430	0.000460376	0.004618142	0.00269562	Cpt1a/Pfkm/Rab14/Prkag1/Mtor/Tsc2/Rps6kb1/Prkaa1/Ppp2r2a/Lepr/Rab8a/Pdpk1/Pik3r2/Igf1/Scd/Acaca/Srebf1/Ccnd1/Pfkp/Gys1/Rheb/Hmgcr/Stradb/Prkab1/Akt3/Ppp2r2b/Rptor/Ppp2r5a/Strada	29
rno05010	Alzheimer disease	68/1102	394/9430	0.000538806	0.005241109	0.003059247	Cox4i1/Atp5pd/Hsd17b10/Tnfrsf1a/Map2k1/Mtor/Cdk5/Mapt/Ppp3ca/Ptgs2/Ndufv3/Il1a/Psen1/Ppp3r1/Il6/Ide/Pik3c3/Psen2/Pik3r2/Calm2/Atp5po/Atp5f1d/Atp5f1e/Tubb5/Ppif/Atp5f1a/Cox6a1/Atp5f1c/Plcb1/Ndufv2/Cox7a2l/App/Ndufb9/Psma7/Ndufs7/Nras/Klc4/Ppid/Klc2/Psmd11/Calml4/Csnk2a1/ND1/Cox5b/Psmd4/Capn1/Nae1/Axin1/Csnk2b/Psmc3/Akt3/Casp12/Capn2/Psma5/Cox8a/CYTB/Ndufb5/Ndufa9/Ndufs8/Ndufs3/Ndufa3/Ndufb2/Ndufc1…	68
rno04722	Neurotrophin signaling pathway	28/1102	127/9430	0.000613635	0.005793433	0.00338164	Mapk14/Sh2b3/Map2k1/Ngfr/Grb2/Bdnf/Psen1/Ntrk3/Ntrk2/Jun/Crk/Bex3/Pdpk1/Psen2/Pik3r2/Calm2/Sort1/Sh2b1/Nras/Rps6ka2/Calml4/Map3k3/Shc2/Map2k5/Akt3/Nfkbia/Mapk11/Ywhae	28
rno04724	Glutamatergic synapse	26/1102	116/9430	0.000728777	0.006683927	0.003901423	Glul/Gnb1/Gnai2/Adcy2/Ppp3ca/Homer1/Grm4/Gng7/Prkcg/Grik5/Ppp3r1/Gria4/Grm8/Kcnj3/Slc1a1/Gnb2/Plcb1/Gnb4/Gng13/Gnb5/Adcy3/Grk2/Pla2g4a/Grm3/Gng10/Grm5	26
rno04115	p53 signaling pathway	19/1102	75/9430	0.000777949	0.006903277	0.004029458	Ccng1/Cdk1/Tsc2/Gadd45a/Ccnd3/Cdk4/Pten/Igf1/Ccnb1/Steap3/Ccnd2/Ccnd1/Shisa5/Mdm2/Cd82/Rchy1/Cdkn1a/Gadd45g/Rprm	19
rno05016	Huntington disease	57/1102	322/9430	0.000795705	0.006903277	0.004029458	Gpx1/Cox4i1/Atp5pd/Sod1/Dctn1/Cltb/Mtor/Ndufv3/Bdnf/Gria4/Pik3c3/Gpx3/Tgm2/Polr2f/Sod2/Atp5po/Atp5f1d/Atp5f1e/Tubb5/Ppif/Atp5f1a/Htt/Cox6a1/Hdac2/Atp5f1c/Plcb1/Ndufv2/Cox7a2l/Ndufb9/Psma7/Ndufs7/Gpx7/Gpx8/Klc4/Klc2/Tbpl1/Psmd11/ND1/Hip1/Clta/Ap2s1/Cox5b/Psmd4/Psmc3/Psma5/Cox8a/CYTB/Ndufb5/Ndufa9/Ndufs8/Ndufs3/Ndufa3/Ndufb2/Ndufc1/Grm5/Ap2m1/Psmb2	57
rno05020	Prion disease	52/1102	288/9430	0.000837882	0.007050175	0.004115203	Cox4i1/Atp5pd/Sod1/Mapk14/Ppp3ca/Egr1/Ndufv3/Il1a/Ppp3r1/Il6/Atf2/Pik3r2/Atp5po/Atp5f1d/Atp5f1e/Tubb5/Ppif/Atp5f1a/Cox6a1/Hspa1b/Atp5f1c/Ndufv2/Cox7a2l/Notch1/Ndufb9/Psma7/Ndufs7/Klc4/Klc2/Psmd11/Csnk2a1/ND1/C1qa/Cox5b/Psmd4/Csnk2b/Psmc3/Casp12/Psma5/Cox8a/CYTB/Ndufb5/Ndufa9/Ndufs8/Ndufs3/Ndufa3/Ndufb2/Ndufc1/Il1b/Mapk11/Ryr3/Psmb2	52
rno05204	Chemical carcinogenesis	24/1102	105/9430	0.000856563	0.007050175	0.004115203	Mgst1/Gsta1/Adh1/Hpgds/Ptgs2/Ugt2a1/Sult1a1/Cyp3a2/Ugt2b7/Ugt2b17/Adh5/Gstt3/Gsta4/Mgst2/Kyat1/Hsd11b1/Gstm1/Gstm7/Cyp3a23-3a1/Ephx1/Gstp1/Mgst3/Gsto1/Gstk1	24
rno04371	Apelin signaling pathway	30/1102	143/9430	0.000952066	0.007293561	0.004257268	Gnb1/Map2k1/Gnai2/Smad4/Prkag1/Adcy2/Mtor/Rps6kb1/Smad2/Egr1/Gng7/Prkaa1/Tgfbr1/Pik3c3/Calm2/Gnb2/Plcb1/Gnb4/Ccnd1/Nras/Calml4/Mylk3/Gng13/Gnb5/Prkab1/Adcy3/Mras/Akt3/Gng10/Ryr3	30
rno01521	EGFR tyrosine kinase inhibitor resistance	20/1102	82/9430	0.000960359	0.007293561	0.004257268	Map2k1/Kdr/Mtor/Rps6kb1/Grb2/Prkcg/Il6/Met/Pik3r2/Pten/Stat3/Igf1/Pdgfa/Fgfr2/Nras/Shc2/Eif4e/Akt3/Hgf/Axl	20
rno05235	PD-L1 expression and PD-1 checkpoint pathway in cancer	22/1102	94/9430	0.000992911	0.007293561	0.004257268	Mapk14/Map2k1/Ptpn6/Mtor/Rps6kb1/Ppp3ca/Stat1/Rasgrp1/Ppp3r1/Jun/Pik3r2/Pten/Stat3/Nras/Ifngr2/Csnk2a1/Map3k3/Csnk2b/Akt3/Map2k6/Nfkbia/Mapk11	22
rno05231	Choline metabolism in cancer	23/1102	100/9430	0.000994188	0.007293561	0.004257268	Map2k1/Ralgds/Mtor/Tsc2/Rps6kb1/Grb2/Slc44a1/Chka/Prkcg/Jun/Plpp1/Pdpk1/Pik3r2/Pdgfa/Plpp3/Nras/Pip5k1c/Rheb/Dgka/Slc22a4/Pla2g4a/Akt3/Plpp2	23
rno05170	Human immunodeficiency virus 1 infection	46/1102	249/9430	0.00099974	0.007293561	0.004257268	B2m/Mapk14/Tnfrsf1a/Gnb1/Map2k1/Cdk1/Gnai2/Mtor/Bak1/Rps6kb1/Ppp3ca/Gng7/Prkcg/Ppp3r1/Ccr5/Jun/Crk/Cxcr4/Pik3r2/Calm2/Ccnb1/RT1-CE16/Wee1/Gnb2/Gnb4/RT1-S3/Irf3/Pxn/Nras/Trim5/Calml4/Tbk1/Gng13/Gnb5/Limk2/RT1-M3-1/Akt3/Map2k6/Ptk2/Gng10/Nfkbia/Ap1s3/Mapk11/Calr/Pdia3/Elob	46
rno00562	Inositol phosphate metabolism	19/1102	77/9430	0.001097476	0.007828659	0.004569606	Plcd1/Plce1/Pi4kb/Pik3c2g/Pik3c3/Pip4k2c/Synj1/Pten/Pi4ka/Plcb1/Isyna1/Pip5k1c/Itpkb/Ocrl/Plcd4/Inpp5d/Cdipt/Minpp1/Impa2	19
rno00220	Arginine biosynthesis	8/1102	20/9430	0.001171882	0.0081777	0.004773342	Glul/Asl/Arg1/Arg2/Glud1/Ass1/Acy1/Gpt	8
rno04213	Longevity regulating pathway - multiple species	17/1102	67/9430	0.001417799	0.009683263	0.005652142	Sod1/Prkag1/Adcy2/Mtor/Rps6kb1/Prkaa1/Cryab/Pik3r2/Sod2/Igf1/Hdac2/Hspa1b/Nras/Prkab1/Adcy3/Akt3/Rptor	17
rno04141	Protein processing in endoplasmic reticulum	34/1102	173/9430	0.001506921	0.010077534	0.005882279	Vcp/Dad1/Ssr4/Sec31a/Nfe2l2/Mogs/Bak1/Lman1/Dnaja1/Atxn3/Pdia4/Cryab/Preb/Hspa1b/Sec61a1/Ube2j2/Ube2g2/Ddost/Ubxn1/Erlec1/Hsp90ab1/Dnajb2/Ero1b/Dnajb1/Mbtps2/Capn1/Ubqln1/Casp12/Dnaja2/Capn2/Hsp90b1/Calr/Nsfl1c/Pdia3	34
rno04510	Focal adhesion	39/1102	207/9430	0.00161795	0.010599227	0.006186792	Map2k1/Kdr/Grb2/Ibsp/Vegfc/Pgf/Rock1/Prkcg/Met/Jun/Crk/Ccnd3/Actn4/Pdpk1/Pik3r2/Pten/Fn1/Igf1/Pdgfa/Ccnd2/Itga7/Rasgrf1/Ccnd1/Itga6/Pxn/Pip5k1c/Tnc/Ppp1r12a/Mylk3/Shc2/Myl12b/Comp/Akt3/Hgf/Capn2/Ptk2/Myl12a/Myl9/Lama4	39
rno05218	Melanoma	18/1102	74/9430	0.001748808	0.0110072	0.006424928	Map2k1/Bak1/Gadd45a/Met/Cdk4/Pik3r2/Fgf18/Pten/Igf1/Pdgfa/Fgf9/Ccnd1/Nras/Mdm2/Akt3/Hgf/Cdkn1a/Gadd45g	18
rno05223	Non-small cell lung cancer	18/1102	74/9430	0.001748808	0.0110072	0.006424928	Map2k1/Bak1/Grb2/Gadd45a/Prkcg/Met/Fhit/Cdk4/Pdpk1/Pik3r2/Stat3/Ccnd1/Nras/Akt3/Hgf/Cdkn1a/Gadd45g/Rxrb	18
rno04068	FoxO signaling pathway	28/1102	136/9430	0.001864211	0.011370369	0.00663691	Mapk14/Map2k1/Tgfb3/Smad4/Prkag1/Homer1/Grb2/Gadd45a/Prkaa1/Il6/Tgfbr1/Pdpk1/Pik3r2/Pten/Sod2/Stat3/Igf1/Ccnb1/Ccnd2/Ccnd1/Nras/Mdm2/Prkab1/Tgfb2/Akt3/Cdkn1a/Gadd45g/Mapk11	28
rno04932	Non-alcoholic fatty liver disease	32/1102	162/9430	0.001877351	0.011370369	0.00663691	Cox4i1/Tnfrsf1a/Prkag1/Ndufv3/Il1a/Prkaa1/Il6/Lepr/Jun/Pik3r2/Cox6a1/Ndufv2/Srebf1/Cox7a2l/Ndufb9/Ndufs7/Cebpa/Gsk3a/Cox5b/Prkab1/Nr1h3/Akt3/Cox8a/CYTB/Ndufb5/Ndufa9/Ndufs8/Ndufs3/Ndufa3/Ndufb2/Ndufc1/Il1b	32
rno04810	Regulation of actin cytoskeleton	42/1102	230/9430	0.002043565	0.012142892	0.007087834	Map2k1/F2r/Rock1/Msn/Crk/Actn4/Pip4k2c/Lpar1/Cxcr4/Pik3r2/Fgf18/Myh10/Fn1/Pdgfa/Itgae/Fgfr2/Fgf9/Ezr/Itga7/Itga6/Pxn/Nras/Pip5k1c/Iqgap2/Cyfip2/Arpc5l/Arhgef4/Ppp1r12a/Mylk3/Ssh3/Arpc1b/Myl12b/Limk2/Mras/Ptk2/Tmsb4x/Abi2/Myl12a/Myl9/Iqgap1/Fgfr4/Arpc1a	42
rno00980	Metabolism of xenobiotics by cytochrome P450	19/1102	81/9430	0.002080558	0.012142892	0.007087834	Mgst1/Gsta1/Adh1/Hpgds/Ugt2a1/Ugt2b7/Ugt2b17/Adh5/Gstt3/Gsta4/Mgst2/Hsd11b1/Gstm1/Gstm7/Ephx1/Gstp1/Mgst3/Gsto1/Gstk1	19
rno04140	Autophagy - animal	29/1102	145/9430	0.002471037	0.014164337	0.008267755	Ctsb/Rraga/Map2k1/Mlst8/Mtor/Tsc2/Rps6kb1/Prkaa1/Pik3c3/Igbp1/Rab8a/Lamp2/Pdpk1/Pik3r2/Pten/Ctsl/Nras/Atg16l1/Uvrag/Rheb/Dapk1/Tbk1/Rab33b/Mras/Akt3/Rab7a/Rptor/Hmgb1/Rab1a	29
rno04015	Rap1 signaling pathway	40/1102	219/9430	0.002569044	0.0143148	0.008355581	Mapk14/Map2k1/Ralgds/Gnai2/Evl/F2r/Kdr/Adcy2/Pard3/Ngfr/Rala/Vegfc/Pgf/Plce1/Prkcg/Met/Cnr1/Crk/Lpar1/Pik3r2/Fgf18/Prkcz/Calm2/Igf1/Pdgfa/Fgfr2/Fgf9/Plcb1/Prkci/Nras/Angpt2/Calml4/Adcy3/Mras/Akt3/Hgf/Magi3/Map2k6/Fgfr4/Mapk11	40
rno04666	Fc gamma R-mediated phagocytosis	22/1102	101/9430	0.002653328	0.0143148	0.008355581	Map2k1/Rps6kb1/Lyn/Prkcg/Crk/Plpp1/Pik3r2/Pla2g6/Ptprc/Marcks/Plpp3/Pip5k1c/Fcgr3a/Arpc5l/Arpc1b/Limk2/Inpp5d/Pla2g4a/Akt3/Plpp2/LOC100910792/Arpc1a	22
rno04020	Calcium signaling pathway	44/1102	247/9430	0.002662893	0.0143148	0.008355581	Camk1/F2r/Plcd1/Kdr/Adcy2/Ppp3ca/Vegfc/Adra1b/P2rx3/Ntrk3/Ntrk2/Cd38/Plce1/Prkcg/Htr7/Ptgfr/Ppp3r1/Met/Avpr1b/Htr2b/Atp2b1/Cxcr4/Fgf18/Calm2/Ppif/Pdgfa/Fgfr2/Fgf9/Plcb1/Atp2b3/Calml4/Mylk3/Itpkb/Ntsr1/Plcd4/Adcy3/Ednrb/Hgf/P2rx7/Htr5b/Fgfr4/Orai1/Grm5/Ryr3	44
rno04066	HIF-1 signaling pathway	25/1102	120/9430	0.002694037	0.0143148	0.008355581	Nppa/Aldoa/Timp1/Map2k1/Pfkm/Mtor/Rps6kb1/Egln3/Hk2/Prkcg/Il6/Pik3r2/Stat3/Igf1/Slc2a1/Pdhb/Pfkp/Angpt2/Ifngr2/Hk1/Eif4e/Aldoc/Akt3/Cdkn1a/Elob	25
rno01522	Endocrine resistance	21/1102	95/9430	0.002720258	0.0143148	0.008355581	Mapk14/Map2k1/Adcy2/Mtor/Rps6kb1/Grb2/Jun/Cdk4/Cdkn2c/Pik3r2/Igf1/Ccnd1/Notch1/Nras/Mdm2/Shc2/Adcy3/Akt3/Ptk2/Cdkn1a/Mapk11	21
rno05166	Human T-cell leukemia virus 1 infection	46/1102	262/9430	0.002894809	0.01498764	0.008748319	B2m/Tnfrsf1a/Map2k1/Tgfb3/Smad4/Adcy2/Smad2/Ppp3ca/Myc/Egr1/Polb/Il15/Ets1/Dlg1/Ppp3r1/Il6/Atf2/Tgfbr1/Jun/Ccnd3/Cdk4/Cdkn2c/Pik3r2/Pten/Tspo/RT1-CE16/Nrp1/Ccnd2/Slc2a1/RT1-Da/RT1-S3/Ccnd1/Nras/Tbpl1/Anapc4/Kat2b/Map3k3/Adcy3/Tgfb2/RT1-M3-1/Akt3/Anapc5/Cdkn1a/Anapc2/Nfkbia/Calr	46
rno05014	Amyotrophic lateral sclerosis	64/1102	391/9430	0.002996205	0.015266376	0.008911018	Vcp/Gpx1/Cox4i1/Atp5pd/Sod1/Mapk14/Tnfrsf1a/Nefm/Dctn1/Mtor/Anxa7/Matr3/Ppp3ca/Ndufv3/Nup98/Ppp3r1/Pik3c3/Gpx3/Rab8a/Atp5po/Atp5f1d/Atp5f1e/Tubb5/Atp5f1a/Cox6a1/Nup62/Atp5f1c/Ndufv2/Cox7a2l/Ndufb9/Psma7/Nxt1/Ndufs7/Gpx7/Gpx8/Klc4/Klc2/Psmd11/Hnrnpa1/ND1/Nup37/Tbk1/Cox5b/Psmd4/Ubqln1/Psmc3/Nup107/Casp12/Rab5a/Map2k6/Psma5/Cox8a/CYTB/Ndufb5/Ndufa9/Ndufs8/Ndufs3/Ndufa3/Ndufb2/Ndufc1/Chchd10/Mapk11/P…	64
rno04370	VEGF signaling pathway	15/1102	60/9430	0.003094612	0.015521411	0.009059883	Mapk14/Map2k1/Kdr/Ppp3ca/Ptgs2/Prkcg/Ppp3r1/Pik3r2/Pxn/Nras/Shc2/Pla2g4a/Akt3/Ptk2/Mapk11	15
rno04931	Insulin resistance	24/1102	115/9430	0.003167056	0.015640386	0.009129328	Tnfrsf1a/Cpt1a/Prkag1/Mtor/Rps6kb1/Prkaa1/Il6/Pdpk1/Pik3r2/Pten/Prkcz/Stat3/Slc2a1/Srebf1/Pygb/Ppp1r3d/Gys1/Rps6ka2/Tbc1d4/Prkab1/Nr1h3/Akt3/Nfkbia/Ppargc1b	24
rno04926	Relaxin signaling pathway	27/1102	135/9430	0.003420462	0.016635882	0.009710402	Mapk14/Gnb1/Map2k1/Gnai2/Adcy2/Smad2/Grb2/Vegfc/Gng7/Atf2/Tgfbr1/Jun/Pik3r2/Prkcz/Gnb2/Plcb1/Gnb4/Nras/Gng13/Gnb5/Shc2/Adcy3/Ednrb/Akt3/Gng10/Nfkbia/Mapk11	27
rno04530	Tight junction	33/1102	175/9430	0.003508979	0.016811674	0.009813012	Pcna/Prkag1/Pard3/Runx1/Rock1/Dlg1/Msn/Prkaa1/Ppp2r2a/Jun/Actn4/Cdk4/Rab8a/Cttn/Myh10/Prkcz/Ybx3/Ezr/Ccnd1/Prkci/Tjp1/Patj/Arpc5l/Mpp5/Arpc1b/Prkab1/Myl12b/Ppp2r2b/Myl12a/Rab13/Myl9/Nedd4l/Arpc1a	33
rno05012	Parkinson disease	46/1102	266/9430	0.003905502	0.018436266	0.01076129	Uba1/Cox4i1/Atp5pd/Nfe2l2/Gnai2/Mapt/Dusp1/Ndufv3/Calm2/Atp5po/Atp5f1d/Atp5f1e/Tubb5/Ppif/Atp5f1a/Cox6a1/Atp5f1c/Ndufv2/Cox7a2l/Ndufb9/Ube2j2/Ube2g2/Psma7/Ndufs7/Klc4/Klc2/Psmd11/Calml4/ND1/Cox5b/Psmd4/Psmc3/Psma5/Cox8a/CYTB/Ndufb5/Ndufa9/Ndufs8/Ndufs3/Ndufa3/Ndufb2/Ndufc1/Ryr3/Uba52/Psmb2/Txn2	46
rno04150	mTOR signaling pathway	31/1102	163/9430	0.004010616	0.018658084	0.010890766	Tnfrsf1a/Rraga/Map2k1/Mlst8/Mtor/Tsc2/Rps6kb1/Grb2/Prkcg/Prkaa1/Pdpk1/Pik3r2/Pten/Igf1/Grb10/Atp6v1e1/Nras/Rictor/Lpin1/Rps6ka2/Rheb/Stradb/Lpin2/Eif4e/Slc7a5/Akt3/Atp6v1d/Rptor/Fzd2/Strada/Atp6v1f	31
rno00020	Citrate cycle (TCA cycle)	10/1102	34/9430	0.004288581	0.019666209	0.01147921	Suclg1/Mdh1/Acly/Mdh2/Idh1/Idh3g/Dlst/Pdhb/Aco1/Pc	10
rno05211	Renal cell carcinoma	17/1102	74/9430	0.004392519	0.019859133	0.011591821	Map2k1/Tgfb3/Egln3/Grb2/Ets1/Met/Jun/Crk/Pik3r2/Slc2a1/Nras/Arnt2/Tgfb2/Akt3/Hgf/Cdkn1a/Elob	17
rno01200	Carbon metabolism	26/1102	131/9430	0.004480765	0.019976745	0.011660471	Aldoa/Suclg1/Mdh1/G6pd/Pfkm/Hk2/Mdh2/Idh1/Me1/Hadha/Glud1/Idh3g/Dlst/Pdhb/Adh5/Pfkp/Mthfr/Pgp/Tkt/Aco1/Pc/Hk1/Aldoc/Gpt/Gck/Hao1	26
rno01230	Biosynthesis of amino acids	19/1102	87/9430	0.004874387	0.021144302	0.012341976	Aldoa/Glul/Asl/Pfkm/Arg1/Arg2/Idh1/Idh3g/Ass1/Mat2a/Acy1/Pfkp/Tkt/Aco1/Pc/Bcat2/Aldoc/Gpt/Asns	19
rno01524	Platinum drug resistance	19/1102	87/9430	0.004874387	0.021144302	0.012341976	Mgst1/Gsta1/Bak1/Pdpk1/Pik3r2/Gstt3/Gsta4/Mgst2/Msh6/Mdm2/Gstm1/Gstm7/Akt3/Gstp1/Mgst3/Cdkn1a/Gsto1/Top2b/Ercc1	19
rno04750	Inflammatory mediator regulation of TRP channels	24/1102	119/9430	0.00500735	0.021431458	0.01250959	Mapk14/Adcy2/Trpv1/Asic2/P2ry2/Prkcg/Htr2b/Prkch/Asic5/Pik3r2/Calm2/Igf1/Pla2g6/Cyp2j3/Asic3/Plcb1/Asic1/Calml4/Adcy3/Il1rap/Pla2g4a/Map2k6/Il1b/Mapk11	24
rno03320	PPAR signaling pathway	19/1102	88/9430	0.00555406	0.023285749	0.013591944	Acadm/Cpt1a/Acsl6/Olr1/Apoc3/Fabp7/Pdpk1/Me1/Dbi/Scp2/Scd/Plin2/Acsl5/Cpt2/Acsl4/Nr1h3/Gk/Cyp27a1/Rxrb	19
rno04114	Oocyte meiosis	24/1102	120/9430	0.005585678	0.023285749	0.013591944	Ywhah/Mapk14/Map2k1/Cdk1/Adcy2/Ppp3ca/Ppp3r1/Spdya/Calm2/Igf1/Ccnb1/Anapc4/Rps6ka2/Calml4/Ywhag/Smc1a/Smc3/Adcy3/Ywhaz/Anapc5/Anapc2/Ppp2r5a/Mapk11/Ywhae	24
rno00100	Steroid biosynthesis	7/1102	20/9430	0.005720451	0.023524674	0.013731405	Fdft1/Cyp51/Lipa/Dhcr7/Sqle/Hsd17b7/Nsdhl	7
rno04713	Circadian entrainment	21/1102	101/9430	0.005811634	0.023524674	0.013731405	Gnb1/Gnai2/Adcy2/Gucy1a1/Per2/Kcnj5/Adcyap1/Gng7/Prkcg/Gria4/Kcnj3/Calm2/Gnb2/Plcb1/Gnb4/Calml4/Gng13/Gnb5/Adcy3/Gng10/Ryr3	21
rno04726	Serotonergic synapse	25/1102	127/9430	0.005862847	0.023524674	0.013731405	Gnb1/Map2k1/Gnai2/Dusp1/Ptgs2/Kcnj5/Gng7/Prkcg/Htr7/Htr2b/Kcnj3/Cyp2d4/Cyp2j3/Gnb2/Plcb1/Gnb4/App/Nras/Gng13/Kcnd2/Gnb5/Pla2g4a/Htr5b/Gng10/Htr1d	25
rno00561	Glycerolipid metabolism	15/1102	64/9430	0.005943428	0.023553586	0.013748281	Dgat1/Aldh3a2/Pnlip/Plpp1/Mgll/Plpp3/Agpat3/Lpin1/Lclat1/Lpin2/Dgka/Gk/Plpp4/Plpp2/Akr1a1	15
rno03030	DNA replication	10/1102	36/9430	0.006696008	0.026212422	0.01530025	Pcna/Rfc1/Rnaseh2a/Rpa1/Ssbp1/Rnaseh2c/Mcm5/Rpa2/Prim1/Rpa3	10
rno05222	Small cell lung cancer	20/1102	96/9430	0.00684725	0.026481531	0.015457329	Bak1/Myc/Ptgs2/Gadd45a/Fhit/Cdk4/Pik3r2/Pten/Fn1/Ccnd1/Itga6/Cks1b/Cks2/Akt3/Ptk2/Cdkn1a/Gadd45g/Rxrb/Lama4/Nfkbia	20
rno05215	Prostate cancer	21/1102	103/9430	0.007331725	0.028017664	0.016353974	Map2k1/Mtor/Grb2/Mmp3/Pdpk1/Pik3r2/Pten/Igf1/Pdgfa/Fgfr2/Zeb1/Ccnd1/Nras/Hsp90ab1/Mdm2/Akt3/Plau/Gstp1/Hsp90b1/Cdkn1a/Nfkbia	21
rno05213	Endometrial cancer	14/1102	60/9430	0.008055009	0.030342168	0.017710792	Map2k1/Bak1/Myc/Grb2/Gadd45a/Pdpk1/Pik3r2/Pten/Ccnd1/Nras/Axin1/Akt3/Cdkn1a/Gadd45g	14
rno01240	Biosynthesis of cofactors	30/1102	164/9430	0.008129054	0.030342168	0.017710792	Nme2/Gusb/Ugdh/Gphn/Mthfd1/Hpd/Aldh3a2/Ggh/Ugt2a1/Pnpo/Ak1/Ugt2b7/Gclc/Ugt2b17/Urod/Mat2a/Ak4/Cox10/Mpi/Ppox/Pank2/Pank1/Bcat2/Ak2/Hmbs/Ppcs/Coq5/Mthfd1l/Oxsm/Akr1a1	30
rno05142	Chagas disease	22/1102	111/9430	0.008646777	0.031903626	0.018622218	Mapk14/Tnfrsf1a/Gnai2/Tgfb3/Ccl2/C3/Smad2/Il6/Ppp2r2a/Tgfbr1/Jun/Pik3r2/Plcb1/Ifngr2/C1qa/Tgfb2/Akt3/Ppp2r2b/Nfkbia/Il1b/Mapk11/Calr	22
rno05161	Hepatitis B	30/1102	165/9430	0.008860231	0.032319706	0.018865085	Pcna/Mapk14/Map2k1/Tgfb3/Smad4/Myc/Grb2/Slc10a1/Stat1/Prkcg/Il6/Atf2/Tgfbr1/Jun/Pik3r2/Stat3/Irf3/Nras/Ifnar1/Tbk1/Irf7/Tgfb2/Akt3/Casp12/Ywhaz/Map2k6/Cdkn1a/Nfkbia/Ifih1/Mapk11	30
rno04727	GABAergic synapse	19/1102	92/9430	0.009091058	0.032789096	0.019139069	Glul/Gnb1/Gnai2/Adcy2/Gphn/Slc6a1/Gng7/Prkcg/Gabre/Gnb2/Gabra5/Gnb4/Gng13/Gabra1/Gnb5/Adcy3/Gabrg1/Gng10/Gabrg2	19
rno04071	Sphingolipid signaling pathway	24/1102	125/9430	0.009368196	0.033413231	0.019503378	Mapk14/Tnfrsf1a/Map2k1/Gnai2/S1pr2/Rock1/Asah1/Prkcg/Ppp2r2a/Pdpk1/Pik3r2/Pten/Prkcz/Abcc1/Plcb1/Nras/Fcer1g/Sptlc2/S1pr3/Akt3/Fcer1a/Ppp2r2b/Ppp2r5a/Mapk11	24
rno05216	Thyroid cancer	10/1102	38/9430	0.010037149	0.035246038	0.020573192	Map2k1/Bak1/Myc/Gadd45a/Tpm3/Ccnd1/Nras/Cdkn1a/Gadd45g/Rxrb	10
rno00983	Drug metabolism - other enzymes	21/1102	106/9430	0.010205473	0.035246038	0.020573192	Mgst1/Nme2/Gsta1/Gusb/Ugt2a1/Xdh/Ces1d/Ugt2b7/Ugt2b17/Tpmt/Gstt3/Gsta4/Mgst2/Tk1/Uck2/Gstm1/Gstm7/Dut/Gstp1/Mgst3/Gsto1	21
rno05032	Morphine addiction	19/1102	93/9430	0.010211469	0.035246038	0.020573192	Gnb1/Gnai2/Adcy2/Kcnj5/Gng7/Prkcg/Gabre/Kcnj3/Gnb2/Gabra5/Gnb4/Gng13/Gabra1/Gnb5/Adcy3/Grk2/Gabrg1/Gng10/Gabrg2	19
rno05140	Leishmaniasis	17/1102	81/9430	0.011236625	0.038371879	0.022397752	Mapk14/Tgfb3/C3/Ptpn6/Ptgs2/Il1a/Stat1/Jun/Eef1a1/RT1-Da/Fcgr3a/Ifngr2/Tgfb2/Cr1l/Nfkbia/Il1b/Mapk11	17
rno04935	Growth hormone synthesis, secretion and action	23/1102	121/9430	0.012176698	0.041064102	0.023969209	Mapk14/Map2k1/Sst/Gnai2/Adcy2/Mtor/Grb2/Sstr2/Stat1/Prkcg/Atf2/Crk/Pik3r2/Stat3/Igf1/Plcb1/Nras/Shc2/Adcy3/Akt3/Map2k6/Ptk2/Mapk11	23
rno04390	Hippo signaling pathway	29/1102	162/9430	0.012280853	0.041064102	0.023969209	Ywhah/Tgfb3/Smad4/Pard3/Smad2/Myc/Bmpr1a/Dlg1/Bmp2/Ppp2r2a/Tgfbr1/Ccnd3/Prkcz/Ccnd2/Ccnd1/Prkci/Tead1/Patj/Mpp5/Frmd6/Tp53bp2/Ywhag/Axin1/Tgfb2/Bmp4/Ywhaz/Ppp2r2b/Fzd2/Ywhae	29
rno05134	Legionellosis	14/1102	63/9430	0.012468561	0.041207535	0.02405293	Vcp/C3/Cxcl2/Arf2/Il6/Eef1a1/Hspa1b/Hsf1/Cr1l/Eef1g/Nfkbia/Pycard/Il1b/Rab1a	14
rno04970	Salivary secretion	17/1102	82/9430	0.012679771	0.041207535	0.02405293	Atp1b1/Adcy2/Gucy1a1/Adra1b/Cd38/Prkcg/Kcnma1/Amy2a3/Atp1b2/Atp2b1/Lyz2/Calm2/Plcb1/Atp2b3/Calml4/Adcy3/Ryr3	17
rno05203	Viral carcinogenesis	39/1102	233/9430	0.012708866	0.041207535	0.02405293	Ywhah/Cdk1/Snd1/C3/Bak1/Polb/Grb2/Lyn/Dlg1/Ccr5/Atf2/Jun/Ccr3/Ccnd3/Actn4/Cdk4/Pik3r2/Stat3/RT1-CE16/Ccnd2/Hdac2/RT1-S3/Ccnd1/Irf3/Pxn/Nras/Tbpl1/Gtf2h4/Hdac11/Kat2b/Rbpj/Mdm2/Irf7/Ywhag/RT1-M3-1/Ywhaz/Cdkn1a/Nfkbia/Ywhae	39
rno03430	Mismatch repair	7/1102	23/9430	0.013236625	0.042489565	0.024801255	Pcna/Rfc1/Rpa1/Ssbp1/Msh6/Rpa2/Rpa3	7
rno00061	Fatty acid biosynthesis	6/1102	18/9430	0.013481601	0.042847463	0.02501016	Acsl6/Acaca/Hsd17b8/Acsl5/Acsl4/Oxsm	6
rno05165	Human papillomavirus infection	57/1102	366/9430	0.013639228	0.042923452	0.025054515	Tnfrsf1a/Map2k1/Mtor/Pard3/Tsc2/Bak1/Rps6kb1/Grb2/Ibsp/Ptgs2/Psen1/Stat1/Dlg1/Ppp2r2a/Ccnd3/Cdk4/Pik3r2/Pten/Prkcz/Fn1/RT1-CE16/Tubg1/Ccnd2/Hdac2/Itga7/RT1-S3/Ccnd1/Itga6/Prkci/Notch1/Irf3/Atp6v1e1/Pxn/Nras/Tbpl1/Tnc/Patj/Rheb/Ifnar1/Tbk1/Rbpj/Mpp5/Mdm2/Hes1/Atp6v0a1/Axin1/Comp/RT1-M3-1/Akt3/Ppp2r2b/Ptk2/Atp6v1d/Cdkn1a/Lama4/Ppp2r5a/Fzd2/Atp6v1f	57
rno04728	Dopaminergic synapse	25/1102	136/9430	0.013953372	0.043485752	0.025382731	Mapk14/Gnb1/Gnai2/Ppp3ca/Kcnj5/Gng7/Prkcg/Ppp2r2a/Gria4/Atf2/Kcnj3/Calm2/Gnb2/Plcb1/Gnb4/Calml4/Caly/Gng13/Gnb5/Gsk3a/Akt3/Ppp2r2b/Gng10/Ppp2r5a/Mapk11	25
rno04540	Gap junction	18/1102	90/9430	0.015117108	0.046659536	0.027235276	Map2k1/Cdk1/Gnai2/Adcy2/Gucy1a1/Grb2/Prkcg/Htr2b/Gja1/Lpar1/Tubb5/Pdgfa/Plcb1/Nras/Tjp1/Map2k5/Adcy3/Grm5	18
rno05135	Yersinia infection	26/1102	144/9430	0.015407613	0.047103275	0.027494288	Mapk14/Map2k1/Ccl2/Rock1/Il6/Jun/Crk/Skap2/Pik3r2/Fn1/Irf3/Pxn/Pip5k1c/Rps6ka2/Arpc5l/Tbk1/Arpc1b/Pkn1/Akt3/Map2k6/Ptk2/Nfkbia/Pycard/Il1b/Mapk11/Arpc1a	26
