# Supplementary material for: Analysis of Potential Hub Genes for Neuropathic Pain Based on Differential Expression in Rat Models
Source: Pain Res Manag. 2022 Mar 3;2022:6571987. doi: 10.1155/2022/6571987 (PMC8913144; doi:10.1155/2022/6571987)
Supplement: Supplementary Materials — Supplementary Figure 1. PPI network of DEGs from RRA analysis. DEGs, differentially expressed genes; PPI, protein-protein interaction; RRA, robust rank aggregation. Supplementary Figure 2. GSEA of candidate hub genes in the GEO dataset. (A) C, (E) and (G) GSEA of the single candidate hub genes in GO terms. (A) VOM2R75, (C) TJP, (E) FOXP1, (G) EXT1, and(B, (D) F, and (H) GSEA of the single candidate hub genes in KEGG pathways. (B) VOM2R75, (D) TJP, (F) FOXP1, and (H) EXT1. GEO, Gene Expression Omnibus; GO, Gene Ontology; GSEA, gene set enrichment analysis. Supplementary 1. Upregulated and downregulated genes obtained by RRA analysis. Supplementary 2. Top 50 genes with the highest connectivity. Supplementary 3. Enrichment of DEGs in the turquoise module in GO and KEGG pathways. Supplementary 4.Heatmap of the top 20 upregulated and downregulated genes identified by RRA analysis. Supplementary 5. Repeated measure ANOVA followed by Tukey's multiple comparison test was used to evaluate the paw withdrawal threshold (PWT) between the Sham and SNI groups in Figure 8(a) and Table 2. Supplementary 6.Expression of the five hub genes in the Sham and SNI groups measured using RT-qPCR in Figure 8(b) and Table 3. [file 6571987.f1.zip › 6571987.f1/Supplementary 4 (1).txt]

ENTREZID	SYMBOL	Pvalue	adjPvalue	logFC
24618	Reg3b	3.85E-07	0.00296031	1.792755222
25389	Atf3	4.33E-07	0.00296031	1.712055617
29141	Gal	7.69E-07	0.003402852	1.420233299
24795	Serpina3n	1.20E-06	0.003402852	1.28583277
117505	Csrp3	1.24E-06	0.003402852	1.219810335
294269	RT1-Da	1.93E-06	0.004390433	0.975986998
24232	C3	2.58E-06	0.005032046	0.99547911
25112	Gadd45a	3.08E-06	0.00526149	1.345433794
499660	Sprr1a	6.50E-06	0.009878474	1.019776127
117064	Vip	8.12E-06	0.011112189	1.36527355
29221	Arg1	1.08E-05	0.013448083	0.964142533
29687	C1qb	2.12E-05	0.024154652	0.817895045
24516	Jun	3.25E-05	0.034169674	0.889728241
29461	Vgf	3.50E-05	0.034214941	0.693706725
27064	Ankrd1	3.77E-05	0.034341551	0.949991375
309122	H19	4.17E-05	0.035684553	0.825908583
60335	Tgm1	4.62E-05	0.037136929	0.974282895
25399	Cacna2d1	4.92E-05	0.037371263	0.987548683
54227	Arpc1b	5.94E-05	0.042742914	0.802370332
79423	Stmn4	6.93E-05	0.047415497	0.879290288
25417	Dpysl4	5.94E-08	0.000812115	-0.910936154
83588	Kcns3	1.92E-07	0.001315757	-1.22791912
24797	Sst	3.85E-07	0.001754172	-0.938050584
117023	Kcns1	6.70E-07	0.001754172	-0.914401672
29701	Scn11a	7.20E-07	0.001754172	-1.267766901
25269	Pvalb	7.69E-07	0.001754172	-0.881830627
140581	Patj	1.36E-06	0.002631002	-0.772983034
293632	Ifitm10	1.69E-06	0.002631002	-0.751356792
83834	Nrn1	1.73E-06	0.002631002	-0.831871907
81574	Scn1a	2.36E-06	0.00322282	-0.9211477
293451	Hs3st2	3.89E-06	0.004842727	-1.126937951
24765	Scg2	5.82E-06	0.0066307	-1.092712516
246274	Faim2	6.72E-06	0.007073401	-0.638063779
24877	Vsnl1	1.04E-05	0.010157704	-0.737759136
79246	Htr3a	1.23E-05	0.010669907	-0.869702146
54231	Car2	1.25E-05	0.010669907	-0.640185536
65195	Kcnd3	1.39E-05	0.011175761	-0.796494957
24417	Grm4	1.60E-05	0.012160005	-0.567617608
29571	Scn10a	1.92E-05	0.013837927	-0.866388205
266600	Csdc2	2.08E-05	0.014252928	-0.621391037
