# Supplementary material for: Analysis of Potential Hub Genes for Neuropathic Pain Based on Differential Expression in Rat Models
Source: Pain Res Manag. 2022 Mar 3;2022:6571987. doi: 10.1155/2022/6571987 (PMC8913144; doi:10.1155/2022/6571987)
Supplement: Supplementary Materials — Supplementary Figure 1. PPI network of DEGs from RRA analysis. DEGs, differentially expressed genes; PPI, protein-protein interaction; RRA, robust rank aggregation. Supplementary Figure 2. GSEA of candidate hub genes in the GEO dataset. (A) C, (E) and (G) GSEA of the single candidate hub genes in GO terms. (A) VOM2R75, (C) TJP, (E) FOXP1, (G) EXT1, and(B, (D) F, and (H) GSEA of the single candidate hub genes in KEGG pathways. (B) VOM2R75, (D) TJP, (F) FOXP1, and (H) EXT1. GEO, Gene Expression Omnibus; GO, Gene Ontology; GSEA, gene set enrichment analysis. Supplementary 1. Upregulated and downregulated genes obtained by RRA analysis. Supplementary 2. Top 50 genes with the highest connectivity. Supplementary 3. Enrichment of DEGs in the turquoise module in GO and KEGG pathways. Supplementary 4.Heatmap of the top 20 upregulated and downregulated genes identified by RRA analysis. Supplementary 5. Repeated measure ANOVA followed by Tukey's multiple comparison test was used to evaluate the paw withdrawal threshold (PWT) between the Sham and SNI groups in Figure 8(a) and Table 2. Supplementary 6.Expression of the five hub genes in the Sham and SNI groups measured using RT-qPCR in Figure 8(b) and Table 3. [file 6571987.f1.zip › 6571987.f1/Supplementary 5.txt]

Tukey's multiple comparisons test	Mean Diff.	95.00% CI of diff.	Significant?	Summary	Adjusted P Value
0
sham-con vs. sham-ips	0.3777	-7.702 to 8.458	No	ns	0.9979
sham-con vs. SNI-con	-0.1278	-10.28 to 10.02	No	ns	>0.9999
sham-con vs. SNI-ips	1.125	-3.998 to 6.249	No	ns	0.8474
sham-ips vs. SNI-con	-0.5055	-11.25 to 10.24	No	ns	0.9979
sham-ips vs. SNI-ips	0.7477	-10.56 to 12.05	No	ns	0.9942
SNI-con vs. SNI-ips	1.253	-6.628 to 9.135	No	ns	0.9319
3
sham-con vs. sham-ips	-1.843	-13.33 to 9.648	No	ns	0.9304
sham-con vs. SNI-con	-0.7585	-6.865 to 5.348	No	ns	0.9651
sham-con vs. SNI-ips	6.122	-0.06220 to 12.31	No	ns	0.0519
sham-ips vs. SNI-con	1.084	-6.733 to 8.901	No	ns	0.9527
sham-ips vs. SNI-ips	7.964	0.2455 to 15.68	Yes	*	0.0446
SNI-con vs. SNI-ips	6.88	0.5311 to 13.23	Yes	*	0.0371
7
sham-con vs. sham-ips	-1.203	-6.666 to 4.261	No	ns	0.8466
sham-con vs. SNI-con	-0.3894	-5.737 to 4.958	No	ns	0.9924
sham-con vs. SNI-ips	11.58	8.041 to 15.12	Yes	***	0.0003
sham-ips vs. SNI-con	0.8134	-7.460 to 9.087	No	ns	0.9819
sham-ips vs. SNI-ips	12.78	7.783 to 17.79	Yes	***	0.0009
SNI-con vs. SNI-ips	11.97	5.466 to 18.48	Yes	**	0.004
10
sham-con vs. sham-ips	0.7826	-3.039 to 4.604	No	ns	0.8709
sham-con vs. SNI-con	0.8101	-4.026 to 5.646	No	ns	0.922
sham-con vs. SNI-ips	12.89	5.085 to 20.69	Yes	**	0.0065
sham-ips vs. SNI-con	0.02751	-5.075 to 5.130	No	ns	>0.9999
sham-ips vs. SNI-ips	12.11	4.416 to 19.80	Yes	**	0.008
SNI-con vs. SNI-ips	12.08	4.854 to 19.31	Yes	**	0.0062
14
sham-con vs. sham-ips	2.729	-8.975 to 14.43	No	ns	0.8249
sham-con vs. SNI-con	0.9952	-2.878 to 4.869	No	ns	0.7827
sham-con vs. SNI-ips	13.2	2.877 to 23.52	Yes	*	0.0193
sham-ips vs. SNI-con	-1.733	-10.25 to 6.786	No	ns	0.8729
sham-ips vs. SNI-ips	10.47	7.473 to 13.46	Yes	***	0.0002
SNI-con vs. SNI-ips	12.2	5.238 to 19.16	Yes	**	0.005
