# Supplementary figures and images for: Analysis of Potential Hub Genes for Neuropathic Pain Based on Differential Expression in Rat Models
Source: Hindawi journal article supplement (doi:10.1155/2022/6571987), 2022-03-03

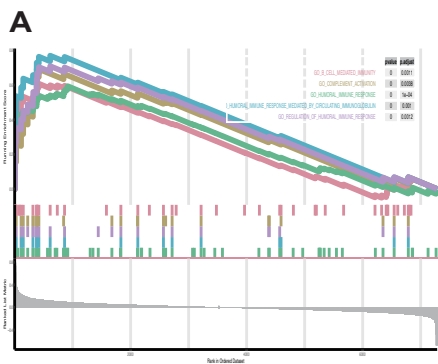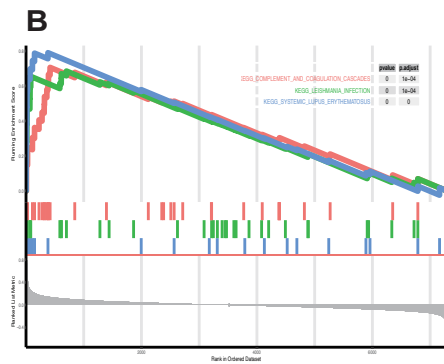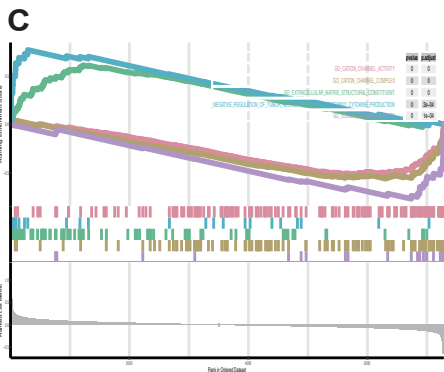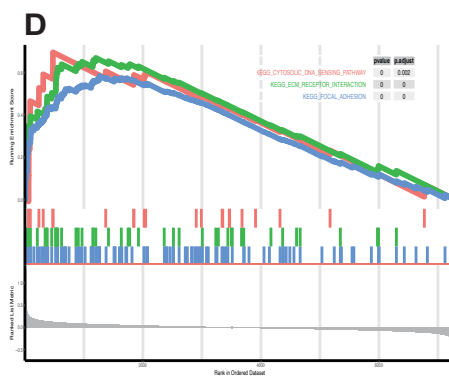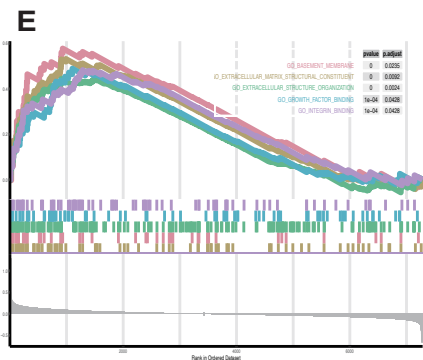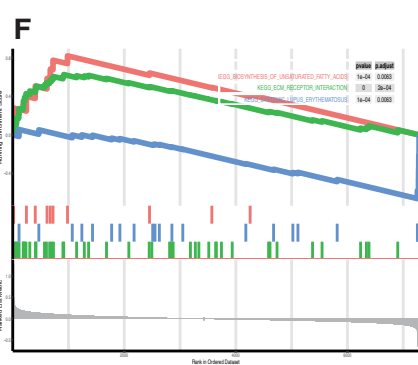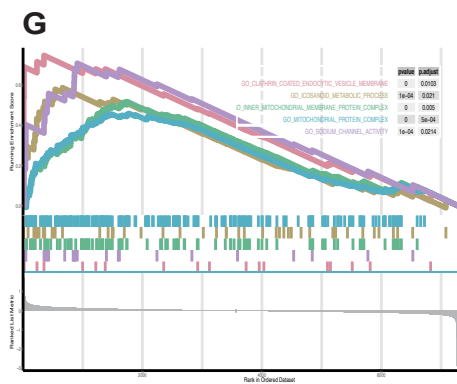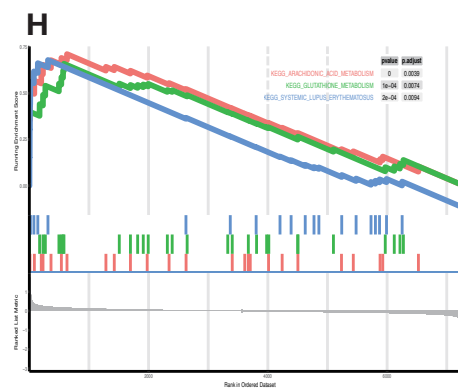

Supplement: f1 [file 6571987.f1.zip]
